# Supplementary material for: Evolution of a Large, Conserved, and Syntenic Gene Family in Insects
Source: PubMed Central journal article supplement (PMC3284338; doi:10.1534/g3.111.001412), 2012-02-01
Supplement: supp_2.2.313_FigureS1.pdf [file supp_2.2.313_FigureS1.pdf]

1\_CG15585 .. CR---VVLAL---LLL---VLLHY---CQAKDEGETTQRGAVLVSLT .. -----ENMAKSAGSQL-V--QADPFISRQKQC-----FET-RSLVSCIYKYT  
2\_CG1148 .. --MAMRALIFL---ALA-----TLVAGEGLRLPDQSSNNIQ .. -----GNDNDFLARTNSNCL-----G-GDLSECFKTOA  
3\_CG1150 .. QTFKVCALLAF---CFV-LVSAR .. --GSKRRDGTVTISESERK-N--IEDFLLAKLKQNCR-----QED---DRACKMVKM  
4\_CG10303 .. HLVASCILLAL---G-L--NMSLA---AIHKRSGANS--LGVD--- .. --GKPA-ANPAVS-V--ENTDLLDKLSWK-----ANNASCLYGVA  
5\_CG15590 .. ---MFRTF-PLLCL---LFLT--- .. --AVRSENC-----DQDAGATLYCRGERA  
6\_CG1151 .. FVATACILLLLA-AGISADPVKAA .. --EEQGAFAQCL-----ESD---SISCLQLTL  
7\_CG1153 .. MASHKVTFGVL---CLV--ALSAA .. --LPAEETRGRHARNAI-G--GENDIMDSIYSACL-----RKD---SVSCVKYKL  
8\_CG15591 .. ---MIKYV---WHV--AALMIVFOWLSSARSASYQH .. --SNPGMGSTGL-W--KDMSMVYRIYQCS-----GDN---MSVCLKVKL  
9\_CG15592 .. ---MFKFVCL---FAL-IASTA .. --AATSEA-D--SLLTSALKMVKDCG-----ERS---MVLCKMERA  
10a\_CG15593 .. ---MSPL-DIVLL--LVSF---HQVIGSDFSAMSLE .. --FKQCVRG-----SOK-PKIGECLGRSA  
10b\_CG15593 .. .. .. .. ..  
11\_CG15596 .. --MESRLGLLI---ALL-LAAFQA .. --WAMEA--PSNYNQNSTE-S--GLLRTVRIHYGQC-----AYS-EDVFWCCKIQG  
12\_CG1154 .. KQWPWQ--ALI---SLLSVLFLA .. CGAATEQL---GSPPGPSPSQ-S--AGARTLLRVYDECT-----RAE-AGFVPCPKKA  
13\_CG15595 .. FKSSISIVVLH--LLL--LVSTG--GAYTL .. .. .. ..  
14\_CG1155 .. ---MKVFAIA-CVTLL-AASCV .. --FAAPSVQDNQVEGDNTLGRAARYLGAC-----LES-DDMATCLAVKG  
15\_CG1157 .. ---MCAKFCV---VVL--LASLV---C-GSMALPSQDNT .. --FMCKYATAASVQPTVEP-AVAPETIRIPQRA-ESLLSGC-----EAS-SFSWMCKLKF  
16\_CG31561 .. ---MLLTKTV-KYLFY-LALFA .. FMCKYATAASVQPTVEP-AVAPETIRIPQRA-ESLLSGC-----EAS-SFSWMCKLKF  
17\_CG15598 .. FLL--LICLIN--SAA---KAD--GTARN--GRLGRHLSTTP .. --PT---RKPM-D-K--MAPSDSLLLRLARR---FASGNELWDGLVRDCYL-KPDVSCFQKNV  
18\_CG1169 .. ---MKSTA-ACLIV--ALAAL---STAHS .. --PTEGVV--AP-Q--SATQLALDMYHGC-----L-K-DLSVSCVVRKA  
19\_CG15189 .. ---MAKLLLIVGVAAAL .. --VAAGQAAGGSTE--KMQRLIAEEQNK-----ASG-QDSMACIKERA  
20\_CG15188 .. AFR---STSL--AFG--CALLL---VASTSVGAAIENA .. --V--TPRI-H--SSDELISTIYDKCF-----H---ANAMHCKLKEV  
21\_CG14925 .. ---KRLEWLL---LLA--LVASV---STAVTPRRRRHSAVESA .. --PGDWGTAWGL-G--PEMALVRRVYDDC-----QDK-NDFIGCLKQKA  
22\_CG8644 .. ---MSDLVR---FLL--LSVLC---SSLALAQASSDG .. --NQETST--VS-Q--EAARGLA-SSYEPEDKQALRKNSHIFMGIYKNIYS--TYLGNKTTSEY  
23\_CG15538 .. R--VPSVLVT---FLL--GVILV---DRYAAGEDLADK .. --SW-I--SQMKLRSDLRDCYQSGIHQS-----LWSCFRSRS  
24\_CG15589 .. NSHRKRRCSP--LYG--IILLC---KVAMIPAAVPE-SELDAGAL .. S-----PRKQESSESA-A-A-FK-----N-----QTITSI-DAELKGLLEDL

1\_CG15585 S-KLIWKLA---TNSMGFFPSEYGRDLAGD-----RGRWLRVLQV-----GEPADVVVFNDAKSLEGDSSELTM-----  
2\_CG1148 L-NTFDEIFF-----KDQYK-----LSDFARVRLPE-----TQQR--SLLQEPF-----EYSEPRGDDDEW  
3\_CG1150 S-IVMNHLY--L-----NTRID-----LGDRFKVTENGN-----ISMV-----PDDPEVNLRSRM-----GSDEET-----  
4\_CG10303 N-GLMASYRR-----GETLK-----LGLFDLVKLPEDA-----SRKHKW-----GTGRG-----  
5\_CG15590 L-RNVLRLNL--RS-----DKPLV-----VIRGLEIVPLQN-----NSIS-----D  
6\_CG1151 F-RKAKSVF--D-----NPQIE-----LFGGVSLVKSNE-----GRQG-----KSLDNSLAVEAAPT-----EARTAE-----  
7\_CG1153 F-SFVDKVL--GA-----RDQFA-----LTEGVTVVRSPD-----APQQ-----EAARSI-----SGDES-----  
8\_CG15591 L-TGLEKAF--RS-----AKSLS-----LMEGIQFVSSGG-----ESEE-----TKRPISEKDIEAVLPRSV-----DAKEQV-----  
9\_CG15592 L-HYFDAE-----NGDVR-----LTEGIALVKTDE-----IPVG-----RSLNEMQLPEEV-----EAREAE-----  
10a\_CG15593 L-NFIQKLD--E-----SDNVK-----FVEDFVTVKSET-----AAVR-----SLSNVLDTPVDF-----  
10b\_CG15593 E-QLLDGAT--RD-----NSTWQ-----ITDYLSIEPK-----V--GISKPE-----TRRMD-----  
11\_CG15596 V-RLLGRAL--K-----VPQLG-----IVDGVSLVRR-----ESFT-----QDTRSGRSSLLESQ-LSNRDLE-----HLSGKS-----  
12\_CG1154 I-SFIDRLA--P-----IDAIN-----VAEGIKLVRLET-----APRP-----PATSENELESSLPRSG-----SDRDAK-----  
13\_CG15595 PPVQ-----MGGAIVAAVEQD-----AEQE--AAAEER-----QRVERHWLSMAE  
14\_CG1155 I-TALNRAA--R-----SNNIE-----LASGVTQORDPA-----SPVS-----RTGKSMSEQDVYAELPQNA-----DERTGR-----  
15\_CG1157 V-NMLNRLD--S-----EESVA-----LFGGLRIDRSES-----GRSF--GASKAV-----  
16\_CG31561 V-KIMEKLA--E-----QEELN-----VLPGISVVKDEN-----A--TELKTS-----ELMAEVARSYP-----SDPSTR-----  
17\_CG15598 F-SYLDNVLDV-----QDYN-----VTQRLKFFKNQVDYQVDKEKEH-----SEARAA-----SAETPIEE-----  
18\_CG1169 L-QWFNSAL--R-----QPEVR-----ITERLSIVRTAE-----KVE-----SRS  
19\_CG15189 M-RFVDNVM--S-----KDSFQ-----VSN-LEVRNNGE-----KTPPINEARAS-----  
20\_CG15188 L-TYLDTVA--NV-----EEEVS-----GRA-----LGDDV-----  
21\_CG14925 L-HALSRAL--D-----QDSIK-----IVDGLALEKQNG-----SETESILG-----SLTDARQFG--NL  
22\_CG8644 KKRLRDRVSA-----PQMAENETPEMVEPDQEDQRDSLAEIRQDAQAE-----ALME--TQTESPNYDDSESLAAKRRRKRKRDRNKRDE-----V-----ESETD  
23\_CG15538 L-HIFEGIM--S-----SPEIS-----IYDGVRLVAA-----P--NS--TD-NATRPDDERKDLKHLT-----  
24\_CG15589 V-DYVEQFFS-----NGRYE-----PTPGLVLAQON-----HSHP--QSYTG-----KR-----

```

1_CG15585    ---ILKFL---KRAMETFGRNH-GLQLRLN---SEGGARVMEES----- .. E----AR- .. -----LK-RKKKK--WLI---ILPLVILMKIA--HLK--
2_CG1148    --NQLLKYG----LRRARFIKST-ALEVEWP---E-ELTEAGRYEARFIGNDIDGELDLIDDG .. QRAGHFSR- .. -----K-KL-KK---M---IIPLLLVLKIF-KLKL--
3_CG1150    ---FALLM---ANKLWKFIRSR-SLRYKFS--E-NTDFVI---NSDPEGSNLGVSVRPL .. E----GR- .. -----G-KM-K---N---MGPLIMMAAK---T-
4_CG10303    -----LSGFMDFVTEN-AIRVPVG---P-MVFSVQRAEDDSYIEVALLKKTSSST .. -----GRL .. G--RRRHQH-QDK-KQ-FQ---M---FIPMYLAATTF---G-
5_CG15590    EEPDQEQGL---LDSLSFYLRTH-EINVKLA---D-LLEDES---QVS----- .. E----AR- .. -----KK-DK---G---QGMLLAMALMF---G-
6_CG1151    ---MGNYF---MDNAKSFFAER-SLNFNFA---NAARSVARAI PDDIKADLREL .. E----SR- .. -----TRKK-KL-LK---K---FLPILLGVGAK---I-
7_CG1153    ---FESLA---LNRISFNLNH-TIKVELK---G-ADIVQA--VSSTGR----- .. E----SR- .. -----GKKK-KA-AK---I---LGPILALVALK---A-
8_CG15591    ---LNNMI---LKRVGNFQDH-TLQVKFDN---EANSV----- .. E----GR- .. -----K-KKEKK---G---NGAMIMIPLLL---G-
9_CG15592    ---VDSLL---VERVARFFGTH-TLQFKVP--K-----DSIQDMQRALE----- .. E----SR- .. -----GKKK-EK-KK---Y---LMPLLMLFKLK---M-
10a_CG15593  ---RGI---LENAGAVMQR-SMEWHMD----- .. T----GR- .. -----V-LT-KQ---Y---LLPFLGLGKFN---L-
10b_CG15593  ---MGL---PGKLELVQGR-ALRLQLP--R-QLTISNAIDDFGSELGLD----- .. Q----GR- .. -----K-KK-DK---D---KNMAMMGMMIM---M-
11_CG15596    ---LDALL---LERFLNFVHSH-QLQVNLN---RLLRFGE--RNVQDWLLHVGVYFMPAS .. E----GR- .. -----KKKDDK---Y---LGPPIAAVLLK-----
12_CG1154    ---LTNML---IERLSYFFNGH-SLQVSFP--K-----LTSDEIGRGLE----- .. E----GR- .. -----G-KM-KK---M---MGMMMGMAMK---M-
13_CG15595    --TQLHSLITDDLSTEEVNML----- .. ETWSTEGR- .. --GKH--KKQK-KL-MK---M---VYPLAAVA---K-
14_CG1155    ---LVDLA---VSSAADFLSTH-NLEFKLP--A-----ETTQQVARALD----- .. E----GR- .. -----G-KI-KK---M---LGPVALAIGAK---L-
15_CG1157    ---ESF---EDRAERYLETH-ELNLSFS--G-DEQDENSENEYTGRAMD----- .. E----SR- .. -----SK-RM-KK---M---LLPPLLALKLK---K-
16_CG31561    ---LNGYI---VAKLENLLRTR-FLRFRL--D-DKSLV----- .. E----GR- .. -----KHKFGK-KG-----G---LEALVAAGVMM---K-
17_CG15598    ---VTSAL---YGKSIKAMTHDLEVDLPE-----VM- .. ALLLIKI- .. -----IK-----IKLFWLLPIVIGVGAACKLLLLK
18_CG1169    ---MNPERR---FDDIDSYLGS-SLRIQAP--E-YFRTSE-ARSLVPDFLMSNPLTQGGLV .. E----GR- .. -----G-MI-RK---A---VLPFLLGLKLK---T-
19_CG15189    ---SADGF---LDAIENYIRGH-DVSMCLP--L-ADAKVTVSARNLVNQLSLNLQNGDD .. E----AR- .. GKKGNIFKKGKHH-RL-RK---L---AMPILVLILLK---A-
20_CG15188    ---LDKVI---VDRLGRLNLTN-EMRLQLP--Q-TFFAGSVVTVRSRDRG--FDLE-LPKD .. E----KK- .. -----K-DK---L---FLPLLLLMKFK---L-
21_CG14925    ---SPIDRAL---LSKADKLMRTH-TLKIDMDVGGGDS--VGR----- .. EH- .. -----GHKK-KKHKEGGH---IKYVVAALLTA---M-
22_CG8644    --QPDPAPE---DETIQRYNVGP-GLNVSID--MS-NDIVHVKLDGENLKEIIGARWLTLDNS .. E----GRG .. -----KKYDMITK---VLPFLAIPFLI---Q-
23_CG15538    ---WFDQL---AVSLAKGLTTH-TLQVNLG--K-LTERYLSSDP-----VG----- .. S----AR- .. -----RR-HR-YN---M---IITMMFGVTAL---G-
24_CG15589    ---TTRSI---LE----- .. RLLFFSGL- .. -----KK-----V---MWPIYMLQVLKSVLF--

```

  

```

1_CG15585    MTLVSMIMG---VLGMNVL .. LVGGVGLIHYLKYTMCKIHP----- .. WATSKAYNA-HNYLDTISKRIQ----- ..
2_CG1148    LLFLPFIILGIAGLKK--- .. ILGLAAIIVLPGI---FAYFK-----LCRPPGGVGA-FGGGLSGLFGKNT .. -PQEAAYNGYGRNSGKDIVAEQQPQKS ..
3_CG1150    GMVGALLLKGFLFLLAGKAL .. IVSKIALLLAVI---ISLKK-----LL-S--SK----- .. -AQNMAYSG-QQPGKVAQ----- ..
4_CG10303    -GWTMVAAKAVGLLTLKAL .. ILSKIAFVVAAI---VLIKK-----LMDN----- .. HM--PYRS----- ..
5_CG15590    KMMAVMGLGGIAALAMKAL .. GVSIVALMMAGM---LGLKT---AA-Q--HG----- .. -LAYRG-WD----- ..
6_CG1151    AVLGVGSIFGLLFLAKKAL .. VVSVIAFFLALA---AGASS-----GLGRIGSGG-GGGLLGLGGLFGGK .. -AQTIAQQG-YKQARR----- ..
7_CG1153    AALLPPLLGAIALIAGKAL .. LIGKIALVLSAV---IGLKK-----LL-S--QE----- .. -AQDLAYGA-QKPVQA----- ..
8_CG15591    GTIVPLAYGALAMLAGKAL .. IVSKLALVLASI---IGIKK-----LL-S--GGGG-G----- .. -ELDTAYSG-WKPAAKESAGSAKSL--- ..
9_CG15592    AALLPLAIGFLALISFKAL .. VIGKIALLLSGI---IGLKK-----LL-E--SK----- .. -AQQLAYAA-YKQ----- ..
10a_CG15593  VALVPLIFAGICLLLKSL .. FLVKLAIYVSSF---LGLGG-----IVGGL-----GGLG .. -TVFGKQDEFHH-----QYD ..
10b_CG15593  ATLAQMFGLKGVILIAGSAF .. IMAKIALVISLL---GSLKK-----GS-T--GHS----- .. GSHMEYYQA-YQMEPLKRR----- ..
11_CG15596    TAILKMAYHSIAIVAGKAL .. IVGKIALIISAI---IGLKK-----LV-G--HDGG----- .. -MQDKAYQA-WMPHVAASPSVAKGS--- ..
12_CG1154    MGMPIAMGALYILAGKAL .. IISKIALLAGI---IGLKK-----LM-S--GKSS-GGSSGWSS----- .. -AQELAYRA-HHQEQVAHAQSRPQ--- ..
13_CG15595    VVLLPLILKWLTAALSTSSF .. VMGKIALVTSGI---LALKW-----ILSGGAHDRL-E----- .. -IISH--APLVKGLH---ASDLSS ..
14_CG1155    FAVIPLVLGFLALLTFKAV .. IVAKLAFFLAIL---VGGSR-----LL-G--GFGN-KFGG---NSFAGAY .. -AQQLAYAG-QQQ----- ..
15_CG1157    AVVVKIMFTTIKFIKAL .. AISFLALILAGA---TFFKD-----LL-A--KKK----- .. -AADLAYNH-YGLAQPF----- ..
16_CG31561    GMLMAMGLGALAMGKAL .. MTALMALTSVSGV---LGLKS-----LA-G--GGG----- .. -FGYGG-YARSLKVDQSANKI--- ..
17_CG15598    LLFLFPALSHLFLKCSHYQ .. ILLKIDKIIIEQL-----GVKN--DLCKERIVCSMYKDPATYSP-HSNFISAELSRDTS .. -YRLIQAARDQDQKDCQSLYPQCN ..
18_CG1169    TVLVPLALGLIALKTKWAM .. TLGLLSLVLSGA---LVIFK-----IAKP----- .. -AQDLAYAGQK----- ..
19_CG15189    ITVIPMAIGILKIKAFNAL .. ALGFFSFIVSG---LAIFQ-----LCK----- .. LGQALAYQA-YA----- ..
20_CG15188    KVIMPILLALIGLKATKAL .. ILSKIAIKLVLG---FLIYN-----LI-Q--KLG--GMK--MNMVMPMA .. -SQNLAYSS-YHPSSSSSYSSGSSGSS ..
21_CG14925    GIAGPLGLKALAAIAGKAL .. VISKVALTIAGI---IALKK-----LFSH----- .. -DPYRYYYEYHQ----- ..
22_CG8644    SAIVPFLVTKLKLKLVKSI .. LVGKLAIFLLII---SAIKN----- .. SAAAAAYNG-YRVEGKPTTWIS----- ..
23_CG15538    AILVPMGFQMLSIVSGKAL .. LLAKMALLLAI---NGLKR-----VA----- .. -NNGLHYGLYHPGE---HLGGY-YDRG ..
24_CG15589    AMFLPTIISVSRLIGKGI . ATLSRY . LLSRLDSVFAQL-----KLNPNENACREKLICLMYANPAKYAP-YSNLVAQLSRELN .. -FKYMRRAKDQGDVDCDESAKCK ..

```

**Figure S1** Alignment of *D. melanogaster* Osiris protein sequences. Multiple alignment was generated using the entire Osiris sequences and aligned *D. melanogaster* sequences are extracted and presented above. The five Osiris signatures are color-coded: predicted signal peptide in red, 2-Cys region in orange, duf1676 region in blue, predicted transmembrane

region in green, and AQXLAY motif in purple. Long insertion regions are excluded and indicated by "..". Osiris 10 proteins are divided into two parts, and included in the alignment as 10a and 10b.
