# Supplementary material for: Evolution of a Large, Conserved, and Syntenic Gene Family in Insects
Source: PubMed Central journal article supplement (PMC3284338; doi:10.1534/g3.111.001412), 2012-02-01
Supplement: supp_2.2.313_TableS2.pdf [file supp_2.2.313_TableS2.pdf]

**Table S2 List of all *Osiris* genes identified from the 13 complete insect genomes.**

**ID:** All IDs are for the first transcript/peptide (-RA/-PA) unless noted otherwise

**Direct:** 1/-1 show the direction relative to Osi2 (1 as the same direction).

**Start/End:** Start and end positions for the coding sequences. For *A. pisum*, transcript start/end positions are shown. When genes are not on the same chromosome or supercontig, only the strand information (+/-) is shown.

**Color codes:**  annotation changed by us in this report

**(*Osiris* group assignment)**

no color based on both synteny and similarity

based on synteny but similarity not conclusive

**Table S2 List of all *Osiris* genes identified from the 13 complete insect genomes.**

| Osiris 1                    |            |             |                            |        |          |          |         |                                                                                                                                                                  |
|-----------------------------|------------|-------------|----------------------------|--------|----------|----------|---------|------------------------------------------------------------------------------------------------------------------------------------------------------------------|
| Genome                      | ID         | Length (AA) | Chromosome (linkage group) | Direct | Start    | End      | # exons | Note                                                                                                                                                             |
| <i>D. melanogaster</i>      | CG15585    | 308         | 3R                         | 1      | 1999367  | 2000555  | 3       |                                                                                                                                                                  |
| <i>D. pseudoobscura</i>     | GA13829    | 304         | 2                          | 1      | 15819977 | 15818610 | 3       | GA13829-PB (FBpp0298266)                                                                                                                                         |
| <i>D. virilis</i>           | GJ14243    | 323         | scaffold_12822             | 1      | 1897146  | 1895783  | 3       |                                                                                                                                                                  |
| <i>D. grimshawi</i>         | GD14014a   | 307         | scaffold_14624             | 1      | 2876740  | 2875141  | 3       | based on the last 2 exons of GH14014<br>GeneWise+Augustus model<br>2875141..2875544,2875805..2875927,2876344..2876740                                            |
| <i>An. gambiae</i>          | AGAP004121 | 284         | 2R                         | 1      | 50327269 | 50328282 | 3       |                                                                                                                                                                  |
| <i>Ae. aegypti</i>          | AAEL015156 | 282         | supercont1.1530            | 1      | 22088    | 5471     | 3       |                                                                                                                                                                  |
| <i>Cu. quinquefasciatus</i> | CPIJ006985 | 293         | Supercontig3.144           | 1      | 369648   | 358007   | 3       |                                                                                                                                                                  |
| <i>B. mori</i>              | None       |             |                            |        |          |          |         |                                                                                                                                                                  |
| <i>Ap. mellifera</i>        | au8.g4218a | 276         | Group15.14                 | 1      | 546442   | 548486   | 4       | Based on au8.g4218 ex1-ex4:<br>(546442..546663,<br>547241..547508,547660..547920,<br>548407..548486)<br>Similarity is weak, no signature domains; but cluster on |
| <i>Ca. floridanus</i>       | None       |             |                            |        |          |          |         |                                                                                                                                                                  |
| <i>T. castaneum</i>         | None       |             |                            |        |          |          |         |                                                                                                                                                                  |
| <i>Ac. pisum</i>            | None       |             |                            |        |          |          |         |                                                                                                                                                                  |
| <i>P. humanus</i>           | None       |             |                            |        |          |          |         |                                                                                                                                                                  |

| NPFR1                       |              |             |                            |        |          |          |         |                                                     |
|-----------------------------|--------------|-------------|----------------------------|--------|----------|----------|---------|-----------------------------------------------------|
| Genome                      | ID           | Length (AA) | Chromosome (linkage group) | Direct | Start    | End      | # exons | Note                                                |
| <i>D. melanogaster</i>      | CG1147       | 485         | 3R                         | 1      | 2014920  | 2019871  | 4       | 4 isoforms, all identical aa seqs                   |
| <i>D. pseudoobscura</i>     | GA11019      | 498         | 2                          | 1      | 15808917 | 15807000 | 3       |                                                     |
| <i>D. virilis</i>           | GJ14245      | 516         | scaffold_12822             | 1      | 1885599  | 1883380  | 3       |                                                     |
| <i>D. grimshawi</i>         | GH14016      | 511         | scaffold_14624             | 1      | 2866563  | 2864216  | 3       |                                                     |
| <i>An. gambiae</i>          | AGAP004123   | 425         | 2R                         | 1      | 50350559 | 50354332 | 3       |                                                     |
| <i>Ae. aegypti</i>          | AAEL010626   | 351         | supercont1.491             | 1      | 826221   | 794272   | 3       |                                                     |
| <i>Cu. quinquefasciatus</i> | CPIJ006984   | 400         | supercont3.144             | 1      | 326156   | 314299   | 3       |                                                     |
| <i>B. mori</i>              | BGIBMGA00001 | 383         | nscaf1071                  | -1     | 456503   | 450075   | 4       | Located after Osi24                                 |
| <i>Ap. mellifera</i>        | None         |             |                            |        |          |          |         |                                                     |
| <i>Ca. floridanus</i>       | None         |             |                            |        |          |          |         |                                                     |
| <i>T. castaneum</i>         | TC011655     | 619         | ChLG9                      | 1      | 20609466 | 20598308 | 6       | TCOGS2:GLEAN_11655 (XP_967689 contains NPFR1+Osi24) |
| <i>Ac. pisum</i>            | ACYPI007664  | 391         | GL349633                   | +      | 115595   | 205777   | 6       |                                                     |
| <i>P. humanus</i>           | PHUM025830   | 364         | DS235004.1                 | 1      | 376037   | 377170   | 2       |                                                     |

| Osiris 24                   |               |             |                            |        |          |          |         |                                                                             |
|-----------------------------|---------------|-------------|----------------------------|--------|----------|----------|---------|-----------------------------------------------------------------------------|
| Genome                      | ID            | Length (AA) | Chromosome (linkage group) | Direct | Start    | End      | # exons | Note                                                                        |
| <i>D. melanogaster</i>      | CG15589       | 533         | 3R                         | 1      | 2030167  | 2032903  | 5       |                                                                             |
| <i>D. pseudoobscura</i>     | GA13830       | 537         | 2                          | 1      | 15796968 | 15795081 | 5       |                                                                             |
| <i>D. virilis</i>           | GJ14246       | 472         | scaffold_12822             | 1      | 1850145  | 1847962  | 6       |                                                                             |
| <i>D. grimshawi</i>         | GH14017       | 497         | scaffold_14624             | 1      | 2854383  | 2852256  | 5       |                                                                             |
| <i>An. gambiae</i>          | AGAP004124    | 409         | 2R                         | 1      | 50384354 | 50387218 | 5       |                                                                             |
| <i>Ae. aegypti</i>          | AAEL010627    | 445         | supercont1.491             | 1      | 449215   | 396633   | 5       |                                                                             |
| <i>Cu. quinquefasciatus</i> | CPIJ006981    | 427         | supercont3.144             | 1      | 144904   | 128341   | 5       |                                                                             |
| <i>B. mori</i>              | BGIBMGA000025 | 479         | nscaf1071                  | -1     | 273107   | 262711   | 7       | Located before NPFR1                                                        |
| <i>Ap. mellifera</i>        | GB18863       | 473         | Group15.14                 | 1      | 552773   | 555471   | 4       | AmeI_2.0_OGSv1_gmap (XP_001121409 LG15:4223598..4226296, no longer in NCBI) |
| <i>Ca. floridanus</i>       | CFLO15236     | 471         | scaffold309                | 1      | 116909   | 101296   | 6       | OGSv1.0 (EFN64650/GL441542.1)                                               |
| <i>T. castaneum</i>         | GLEAN_11656   | 418         | ChLG9                      | 1      | 20593022 | 20590333 | 4       | Glean_5_19_06 (XP_967689 contains NPFR1+Osi24)                              |
| <i>Ac. pisum</i>            | ACYPI52893    | 501         | GL349761                   | 1      | 61451    | 21695    | 7       |                                                                             |
| <i>P. humanus</i>           | PHUM026040    | 295         | DS235004.1                 | 1      | 403565   | 405857   | 5       | 5'-end missing                                                              |

| Osiris 2                    |               |             |                            |        |          |          |         |                                                             |
|-----------------------------|---------------|-------------|----------------------------|--------|----------|----------|---------|-------------------------------------------------------------|
| Genome                      | ID            | Length (AA) | Chromosome (linkage group) | Direct | Start    | End      | # exons | Note                                                        |
| <i>D. melanogaster</i>      | CG1148-PA     | 390         | 3R                         | 1      | 2037184  | 2039100  | 4       | isoform                                                     |
|                             | CG1148-PB     | 390         | 3R                         | 1      | 2037184  | 2039100  | 4       | isoform                                                     |
| <i>D. pseudoobscura</i>     | GA13830       | 404         | 2                          | 1      | 15789619 | 15788078 | 4       |                                                             |
| <i>D. virilis</i>           | GJ14247       | 397         | scaffold_12822             | 1      | 1842804  | 1841325  | 4       |                                                             |
| <i>D. grimshawi</i>         | GH14018       | 406         | scaffold_14624             | 1      | 2847740  | 2845905  | 4       |                                                             |
| <i>An. gambiae</i>          | AGAP004125    | 369         | 2R                         | 1      | 50398489 | 50399671 | 2       |                                                             |
| <i>Ae. aegypti</i>          | AAEL010623    | 365         | supercont1.491             | 1      | 232553   | 231401   | 2       | missing the 3' end                                          |
| <i>Cu. quinquefasciatus</i> | CPIJ008149    | 362         | Supercontig 3.179          | 1      | 692137   | 690987   | 2       |                                                             |
| <i>B. mori</i>              | BGIBMGA000040 | 142         | nscaf1071                  | 1      | 584271   | 584699   | 1       | missing 3' half, weak similarity                            |
| <i>Ap. mellifera</i>        | GB15845       | 325         | Group15.14                 | 1      | 558576   | 559878   | 4       | Amel_2.0_OGSv1_gmap (XP_001121449.1, LG15:4536711..4539563) |
| <i>Ca. floridanus</i>       | CFLO15237     | 317         | scaffold309                | 1      | 97058    | 94081    | 4       | OGSv1.0 (EFN64649/GL441542.1)                               |
| <i>T. castaneum</i>         | TC011657      | 319         | ChLG9                      | 1      | 20588465 | 20587053 | 5       | TCOGS2, XP_967536.1                                         |
| <i>Ac. pisum</i>            | ACYPI007856   | 377         | GL349761                   | 1      | 7604     | 120      | 3       |                                                             |
| <i>P. humanus</i>           | PHUM026050    | 369         | DS235004.1                 | 1      | 413407   | 415968   | 3       |                                                             |

| Osiris 3                    |               |             |                            |        |          |          |         |                                                            |
|-----------------------------|---------------|-------------|----------------------------|--------|----------|----------|---------|------------------------------------------------------------|
| Genome                      | Acc#          | Length (AA) | Chromosome (linkage group) | Direct | Start    | End      | # exons | Note                                                       |
| <i>D. melanogaster</i>      | CG1150        | 288         | 3R                         | 1      | 2041786  | 2043639  | 3       |                                                            |
| <i>D. pseudoobscura</i>     | GA11035       | 289         | 2                          | 1      | 15785557 | 15784397 | 3       |                                                            |
| <i>D. virilis</i>           | GJ14248       | 282         | scaffold_12822             | 1      | 1837891  | 1836711  | 3       |                                                            |
| <i>D. grimshawi</i>         | GH14019       | 284         | scaffold_14624             | 1      | 2842701  | 2841453  | 3       |                                                            |
| <i>An. gambiae</i>          | AGAP004126    | 295         | 2R                         | 1      | 50423391 | 50425056 | 3       |                                                            |
| <i>Ae. aegypti</i>          | AAEL010624    | 287         | supercont1.491             | 1      | 153272   | 137568   | 3       |                                                            |
| <i>Cu. quinquefasciatus</i> | CPIJ008148    | 269         | supercont3.179             | 1      | 677815   | 663250   | 3       |                                                            |
| <i>B. mori</i>              | BGIBMGA000042 | 212         | nscaf1071                  | 1      | 620089   | 626738   | 4       | missing regions at both ends                               |
| <i>Ap. mellifera</i>        | GB19141       | 294         | Group15.14                 | 1      | 565917   | 567581   | 2       | Amel_2.0_OGSv1_gmap (XP_001121482.1 LG15:4544707..4547498) |
| <i>Ca. floridanus</i>       | CFLO15238     | 278         | scaffold309                | 1      | 85571    | 84078    | 2       | OGSv1.0 (EFN64648/GL441542.1)                              |
| <i>T. castaneum</i>         | TC011658      | 276         | ChLG9                      | 1      | 20584063 | 20582557 | 4       | TCOGS2, XP_967452.1                                        |
| <i>Ac. pisum</i>            | ACYPI001904   | 303         | GL349870                   | +      | 639943   | 646593   | 3       |                                                            |
| <i>P. humanus</i>           | PHUM026160    | 300         | DS235004.1                 | 1      | 431224   | 433412   | 5       |                                                            |

| Osiris 4                    |            |             |                            |        |          |          |         |      |
|-----------------------------|------------|-------------|----------------------------|--------|----------|----------|---------|------|
| Genome                      | ID         | Length (AA) | Chromosome (linkage group) | Direct | Start    | End      | # exons | Note |
| <i>D. melanogaster</i>      | CG10303    | 393         | 3R                         | -1     | 2047384  | 2044255  | 4       |      |
| <i>D. pseudoobscura</i>     | GA10232    | 405         | 2                          | -1     | 15780992 | 15783643 | 4       |      |
| <i>D. virilis</i>           | GJ14490    | 399         | scaffold_12822             | -1     | 1832406  | 1835997  | 4       |      |
| <i>D. grimshawi</i>         | GH14283    | 403         | scaffold_14624             | -1     | 2837162  | 2840675  | 4       |      |
| <i>An. gambiae</i>          | AGAP004127 | 306         | 2R                         | -1     | 50430646 | 50429581 | 3       |      |
| <i>Ae. aegypti</i>          | AAEL010625 | 312         | supercont1.491             | -1     | 88165    | 101794   | 3       |      |
| <i>Cu. quinquefasciatus</i> | CPIJ008147 | 317         | supercont3.179             | -1     | 651118   | 653972   | 3       |      |
| <i>B. mori</i>              | None       |             |                            |        |          |          |         |      |
| <i>Ap. mellifera</i>        | None       |             |                            |        |          |          |         |      |
| <i>Ca. floridanus</i>       | None       |             |                            |        |          |          |         |      |
| <i>T. castaneum</i>         |            |             |                            |        |          |          |         |      |
| <i>Ac. pisum</i>            | None       |             |                            |        |          |          |         |      |
| <i>P. humanus</i>           | None       |             |                            |        |          |          |         |      |

| Osiris 5                    |              |             |                            |        |          |          |         |                                                                                                                       |
|-----------------------------|--------------|-------------|----------------------------|--------|----------|----------|---------|-----------------------------------------------------------------------------------------------------------------------|
| Genome                      | ID           | Length (AA) | Chromosome (linkage group) | Direct | Start    | End      | # exons | Note                                                                                                                  |
| <i>D. melanogaster</i>      | CG15590-PA   | 202         | 3R                         | 1      | 2053428  | 2054461  | 2       | isoform                                                                                                               |
|                             | CG15590-PB   | 201         | 3R                         | 1      | 2053428  | 2054458  | 2       | isoform                                                                                                               |
| <i>D. pseudoobscura</i>     | GA13832      | 212         | 2                          | 1      | 15775460 | 15774575 | 2       |                                                                                                                       |
| <i>D. virilis</i>           | GJ14249      | 210         | scaffold_12822             | 1      | 1823924  | 1822411  | 2       |                                                                                                                       |
| <i>D. grimshawi</i>         | GH14020      | 219         | scaffold_14624             | 1      | 2830195  | 2828423  | 2       |                                                                                                                       |
| <i>An. gambiae</i>          | AGAP012556   | 228         | UNKN                       | -      | 15940121 | 15939378 | 2       |                                                                                                                       |
| <i>Ae. aegypti</i>          | AAEL010628   | 257         | supercont1.491             | -1     | 36946    | 50288    | 2       |                                                                                                                       |
|                             | AAEL010631   | 249         | supercont1.491             | 1      | 12724    | 1865     | 2       |                                                                                                                       |
| <i>Cu. quinquefasciatus</i> | CPIJ008146   | 251         | supercont3.179             | 1      | 634575   | 623303   | 2       |                                                                                                                       |
| <i>B. mori</i>              | BGIBMGA00004 | 163         | nscaf1071                  | 1      | 688056   | 693867   | 3       | Weak similarity                                                                                                       |
| <i>Ap. mellifera</i>        | au8.g4221a   | 293         | Group15.14                 | 1      | 572124   | 573215   | 3       | Based on au8.g4221.t1 ex1-ex3, (572124..572628,572715..572822,572947..573215) (XP_001121508 LG15:4551244..4552330, no |
| <i>Ca. floridanus</i>       | CFLO15239    | 152         | scaffold309                | 1      | 78191    | 77108    | 3       | OGSv1.0 (EFN64647/GL441542.1) missing 5' region                                                                       |
| <i>T. castaneum</i>         | TC011659     | 229         | ChLG9                      | 1      | 20578022 | 20576613 | 2       | 5a, TCOGS2, XP_976093.1                                                                                               |
|                             | TC012811     | 232         | ChLG9                      | -1     | 20581262 | 20582060 | 5       | 5b, TCOGS2, Osi5-like?                                                                                                |
| <i>Ac. pisum</i>            | None         |             |                            |        |          |          |         |                                                                                                                       |
| <i>P. humanus</i>           | None         |             |                            |        |          |          |         |                                                                                                                       |



| Osiris 6                    |             |             |                            |        |          |          |         |                                                            |
|-----------------------------|-------------|-------------|----------------------------|--------|----------|----------|---------|------------------------------------------------------------|
| Genome                      | ID          | Length (AA) | Chromosome (linkage group) | Direct | Start    | End      | # exons | Note                                                       |
| <i>D. melanogaster</i>      | CG1151      | 312         | 3R                         | 1      | 2060458  | 2062024  | 2       |                                                            |
| <i>D. pseudoobscura</i>     | GA26494     | 288         | 2                          | 1      | 15768074 | 15766825 | 2       |                                                            |
| <i>D. virilis</i>           | GJ14250     | 294         | scaffold_12822             | 1      | 1813629  | 1812417  | 2       |                                                            |
| <i>D. grimshawi</i>         | GH14022     | 297         | scaffold_14624             | 1      | 2820796  | 2819537  | 2       |                                                            |
| <i>An. gambiae</i>          | AGAP004129  | 237         | 2R                         | 1      | 50491387 | 50492715 | 2       |                                                            |
| <i>Ae. aegypti</i>          | AAELO14433  | 240         | supercont1.1116            | +      | 181441   | 189732   | 2       |                                                            |
| <i>Cu. quinquefasciatus</i> | CPIJ008144  | 240         | supercont3.179             | 1      | 530566   | 525882   | 2       |                                                            |
| <i>B. mori</i>              | None        |             |                            |        |          |          |         |                                                            |
| <i>Ap. mellifera</i>        | GB19629     | 257         | Group15.14                 | 1      | 580714   | 581723   | 3       | Amel_2.0_OGSv1_gmap (XP_001121541.1 LG15:4559825..4560843) |
| <i>Ca. floridanus</i>       | CFLO15240   | 273         | scaffold309                | 1      | 70694    | 69570    | 3       | OGSv1.0 (EFN64646/GL441542.1)                              |
| <i>T. castaneum</i>         | None        |             |                            |        |          |          |         |                                                            |
| <i>Ac. pisum</i>            | ACYPI000840 | 287         | GL349857                   | -      | 605198   | 602013   | 4       |                                                            |
| <i>P. humanus</i>           | None        |             |                            |        |          |          |         |                                                            |

| Osiris 7                    |               |             |                            |        |          |          |         |                                                                                              |
|-----------------------------|---------------|-------------|----------------------------|--------|----------|----------|---------|----------------------------------------------------------------------------------------------|
| Genome                      | ID            | Length (AA) | Chromosome (linkage group) | Direct | Start    | End      | # exons | Note                                                                                         |
| <i>D. melanogaster</i>      | CG1153        | 288         | 3R                         | 1      | 2074929  | 2075795  | 1       |                                                                                              |
| <i>D. pseudoobscura</i>     | GA11054       | 287         | 2                          | 1      | 15754289 | 15753426 | 1       |                                                                                              |
| <i>D. virilis</i>           | GJ14251       | 288         | scaffold_12822             | 1      | 1797298  | 1796432  | 1       |                                                                                              |
| <i>D. grimshawi</i>         | GH14023       | 291         | scaffold_14624             | 1      | 2805530  | 2804655  | 1       |                                                                                              |
| <i>An. gambiae</i>          | AGAP004130    | 297         | 2R                         | 1      | 50520138 | 50521031 | 1       |                                                                                              |
| <i>Ae. aegypti</i>          | None          |             |                            |        |          |          |         |                                                                                              |
| <i>Cu. quinquefasciatus</i> | CPIJ008141    | 288         | supercont3.179             | 1      | 431192   | 430326   | 1       |                                                                                              |
| <i>B. mori</i>              | BGIBMGA000044 | 261         | nscaf1071                  | 1      | 709297   | 710082   | 1       |                                                                                              |
| <i>Ap. mellifera</i>        | GB13419       | 277         | Group15.14                 | 1      | 587513   | 589282   | 3       | Amel_2.0_OGSv1_gmap (XP_624937.1 LG15:4566421..4568940)                                      |
| <i>Ca. floridanus</i>       | CFLO15241a    | 275         | scaffold309                | 1      | 63969    | 61248    | 3       | CFLO15241:ex1-ex3 AUGUSTUS model 61248..61630,63407..63582,63701..63969 (EFN64645=Osi7+Osi8) |
| <i>T. castaneum</i>         | TC011660      | 278         | ChLG9                      | 1      | 20571810 | 20570974 | 1       | TCOGS2, XP_967197.1                                                                          |
| <i>Ac. pisum</i>            | ACYPI002725   | 298         | GL349857                   | -      | 577533   | 574085   | 3       |                                                                                              |
| <i>P. humanus</i>           | PHUM026170    | 272         | DS235004.1                 | 1      | 443236   | 446107   | 3       |                                                                                              |

| Osiris 8                    |               |             |                            |        |          |          |         |                                                                                                                   |
|-----------------------------|---------------|-------------|----------------------------|--------|----------|----------|---------|-------------------------------------------------------------------------------------------------------------------|
| Genome                      | ID            | Length (AA) | Chromosome (linkage group) | Direct | Start    | End      | # exons | Note                                                                                                              |
| <i>D. melanogaster</i>      | CG15591       | 274         | 3R                         | 1      | 2080997  | 2082114  | 2       |                                                                                                                   |
| <i>D. pseudoobscura</i>     | GA13833       | 287         | 2                          | 1      | 15747924 | 15746989 | 2       |                                                                                                                   |
| <i>D. virilis</i>           | GJ14253a      | 276         | scaffold_12822             | 1      | 1786185  | 1785242  | 3       | GJ14253+GJ14254<br>AUGUSTUS:<br>1785242..1785634,1785675..1785839,1785913..1786185                                |
| <i>D. grimshawi</i>         | GH14024       | 281         | scaffold_14624             | 1      | 2798067  | 2797160  | 2       |                                                                                                                   |
| <i>An. gambiae</i>          | AGAP004128    | 282         | 2R                         | 1      | 50448638 | 50449565 | 2       | extra 3 aa's before M                                                                                             |
| <i>Ae. aegypti</i>          | AAEL004275    | 247         | supercont1.113             | -      | 492815   | 491930   | 2       |                                                                                                                   |
| <i>Cu. quinquefasciatus</i> | CPIJ008140    | 280         | supercont3.179             | 1      | 388401   | 387495   | 2       |                                                                                                                   |
| <i>B. mori</i>              | BGIBMGA000009 | 236         | nscaf1071                  | -1     | 828580   | 820371   | 3       |                                                                                                                   |
| <i>Ap. mellifera</i>        | GB10057       | 264         | Group15.14                 | 1      | 592556   | 593593   | 2       | Amel_2.0_OGSv1_gmap<br>(XP_003249793.1<br>LG15:4571385..4573071)                                                  |
| <i>Ca. floridanus</i>       | CFLO15241b    | 259         | scaffold309                | 1      | 56944    | 55895    | 2       | CFLO15241:ex4-ex5<br>AUGUSTUS model<br>55895..56178,56447..56944<br>(starts with 'atatt')<br>(EFN64645=Osi7+Osi8) |
| <i>T. castaneum</i>         | TC011661      | 254         | ChLG9                      | 1      | 20567569 | 20566676 | 2       | TCOGS2, XP_967101.1                                                                                               |
| <i>Ac. pisum</i>            | ACYPI005238   | 254         | GL349857                   | -      | 550960   | 544609   | 3       |                                                                                                                   |
| <i>P. humanus</i>           | None          |             |                            |        |          |          |         |                                                                                                                   |

| Osiris 9                    |                |             |                            |        |          |          |         |                                                                                                                                 |
|-----------------------------|----------------|-------------|----------------------------|--------|----------|----------|---------|---------------------------------------------------------------------------------------------------------------------------------|
| Genome                      | ID             | Length (AA) | Chromosome (linkage group) | Direct | Start    | End      | # exons | Note                                                                                                                            |
| <i>D. melanogaster</i>      | CG15592        | 233         | 3R                         | 1      | 2086135  | 2087371  | 3       |                                                                                                                                 |
| <i>D. pseudoobscura</i>     | GA13834        | 232         | 2                          | 1      | 15742961 | 15741569 | 3       |                                                                                                                                 |
| <i>D. virilis</i>           | GJ14255        | 231         | scaffold_12822             | 1      | 1780683  | 1779314  | 3       |                                                                                                                                 |
| <i>D. grimshawi</i>         | GH14025        | 231         | scaffold_14624             | 1      | 2792525  | 2791171  | 3       |                                                                                                                                 |
| <i>An. gambiae</i>          | AGAP004131     | 238         | 2R                         | 1      | 50568998 | 50570643 | 3       |                                                                                                                                 |
| <i>Ae. aegypti</i>          | AAEL004280     | 237         | supercont1.113             | -      | 282815   | 276138   | 3       |                                                                                                                                 |
| <i>Cu. quinquefasciatus</i> | CPIJ008139     | 235         | supercont3.179             | 1      | 291863   | 289386   | 3       |                                                                                                                                 |
| <i>B. moriyama</i>          | BGIBMGA000013  | 239         | nscaf1071                  | -1     | 731188   | 722003   | 3       | 9f                                                                                                                              |
|                             | BGIBMGA000045  | 241         | nscaf1071                  | 1      | 756455   | 761654   | 3       | 9e                                                                                                                              |
|                             | BGIBMGA000012b | 243         | nscaf1071                  | -1     | 776934   | 775097   | 3       | 9d 000012 contains two Osi9 Augustus model nscaf1071:775097..775440,776272..776524,776800..776934                               |
|                             | BGIBMGA000012a | 341         | nscaf1071                  | -1     | 780388   | 777716   | 5       | 9c 000012 contains two Osi9 Augustus model nscaf1071:777716..778070,779043..779240,779318..779351,779496..779742,780197..780388 |
|                             | BGIBMGA000011  | 235         | nscaf1071                  | -1     | 795081   | 788764   | 3       | 9b                                                                                                                              |
|                             | BGIBMGA000010  | 240         | nscaf1071                  | -1     | 813664   | 807853   | 3       | 9a                                                                                                                              |
| <i>Ap. mellifera</i>        | GB19626        | 255         | Group15.14                 | 1      | 599571   | 600600   | 3       | Amel_2.0_OGSv1_gmap (XP_001121625.1 LG15:4578466..4580519)                                                                      |
| <i>Ca. floridanus</i>       | CFLO15242      | 250         | scaffold309                | 1      | 49954    | 48426    | 3       | OGSv1.0 (EFN64644/GL441542.1)                                                                                                   |
| <i>T. castaneum</i>         | TC011662       | 250         | ChLG9                      | 1      | 20564637 | 20562939 | 3       | TCOGS2, XP_001808361.1                                                                                                          |
| <i>Ac. pisum</i>            | ACYPI004638    | 264         | GL349857                   | -      | 502336   | 498348   | 2       |                                                                                                                                 |
| <i>P. humanus</i>           | PHUM026280     | 258         | DS235004.1                 | 1      | 457230   | 458434   | 3       |                                                                                                                                 |

| Osiris 10                   |                |             |                            |        |          |          |         |                                                     |
|-----------------------------|----------------|-------------|----------------------------|--------|----------|----------|---------|-----------------------------------------------------|
| Genome                      | ID             | Length (AA) | Chromosome (linkage group) | Direct | Start    | End      | # exons | Note                                                |
| <i>D. melanogaster</i>      | CG15593-PB     | 741         | 3R                         | 1      | 2089581  | 2093117  | 4       | possibly 10a+10b                                    |
|                             | CG15593-PA     | 576         | 3R                         | 1      | 2089698  | 2093117  | 5       | possibly 10a+10b                                    |
| <i>D. pseudoobscura</i>     | GA13835-PC     | 634         | 2                          | 1      | 15738413 | 15735593 | 5       | possibly 10a+10b                                    |
|                             | GA13835-PB     | 767         | 2                          | 1      | 15738488 | 15735593 | 4       | possibly 10a+10b                                    |
| <i>D. virilis</i>           | GJ14257        | 592         | scaffold_12822             | 1      | 1775378  | 1771016  | 5       | possibly 10a+10b                                    |
| <i>D. grimshawi</i>         | GH14026        | 509         | scaffold_14624             | 1      | 2787800  | 2784545  | 5       | possibly 10a+10b<br>missing 5' end                  |
| <i>An. gambiae</i>          | AGAP004132     | 610         | 2R                         | 1      | 50579082 | 50585938 | 5       | possibly 10a+10b                                    |
| <i>Ae. aegypti</i>          | AAEL004303     | 565         | supercont1.113             | -      | 205352   | 160117   | 5       | possibly 10a+10b                                    |
| <i>Cu. quinquefasciatus</i> | CPIJ008138     | 564         | supercont3.179             | 1      | 260063   | 230396   | 5       | possibly 10a+10b                                    |
| <i>B. mori</i>              | BGIBMGA000046  | 314         | nscaf1071                  | 1      | 839498   | 846172   | 4       | 10a or 10b only                                     |
| <i>Ap. mellifera</i>        | XP_003249790.1 | 314         | Group15.14                 | 1      | 602439   | 603849   | 2       | 10a, NCBI_RefSeq                                    |
| <i>Ca. floridanus</i>       | GB13856        | 223         | Group15.14                 | 1      | 606624   | 607462   | 3       | 10b, Amel_2.0_OGSv1_gmap                            |
|                             | CFL015243      | 283         | scaffold309                | 1      | 46630    | 44997    | 2       | 10a, OGSv1.0<br>(EFN64643/GL441542.1)               |
| <i>T. castaneum</i>         | CFL015244      | 219         | scaffold309                | 1      | 40662    | 39172    | 3       | 10b, OGSv1.0<br>(EFN64644/GL441542.1)               |
|                             | XP_967021.2    | 533         | ChLG9                      | 1      | 20561128 | 20557379 | 8       | LOC655388,<br>TC011663+TC011664<br>possibly 10a+10b |
| <i>Ac. pisum</i>            | ACYPI37205     | 360         | GL349857                   | -      | 494658   | 484212   | 4       | 10a                                                 |
|                             | ACYPI37204     | 240         | GL349857                   | +      | 477903   | 479043   | 2       | 10b                                                 |
| <i>P. humanus</i>           | PHUM026300     | 307         | DS235004.1                 | 1      | 470753   | 471897   | 4       | 10a                                                 |
|                             | PHUM026310     | 165         | DS235004.1                 | 1      | 476,424  | 477503   | 4       | 10b                                                 |

| Osiris 11                   |               |             |                            |        |          |          |         |                                                                               |
|-----------------------------|---------------|-------------|----------------------------|--------|----------|----------|---------|-------------------------------------------------------------------------------|
| Genome                      | ID            | Length (AA) | Chromosome (linkage group) | Direct | Start    | End      | # exons | Note                                                                          |
| <i>D. melanogaster</i>      | CG15596       | 302         | 3R                         | -1     | 2094410  | 2093502  | 1       |                                                                               |
| <i>D. pseudoobscura</i>     | GA13838       | 317         | 2                          | -1     | 15734475 | 15735428 | 1       |                                                                               |
| <i>D. virilis</i>           | GJ14489       | 321         | scaffold_12822             | -1     | 1769902  | 1770867  | 1       |                                                                               |
| <i>D. grimshawi</i>         | GH14282       | 326         | scaffold_14624             | -1     | 2783391  | 2784371  | 1       |                                                                               |
| <i>An. gambiae</i>          | AGAP004134    | 263         | 2R                         | 1      | 50594209 | 50595000 | 1       |                                                                               |
| <i>Ae. aegypti</i>          | AAEL004298    | 263         | supercont1.113             | +      | 85610    | 86401    | 1       |                                                                               |
| <i>Cu. quinquefasciatus</i> | CPIJ008136    | 262         | supercont3.179             | 1      | 198762   | 197867   | 1       |                                                                               |
| <i>B. mori</i>              | BGIBMGA00000  | 253         | nscaf1071                  | -1     | 851744   | 850983   | 1       |                                                                               |
| <i>Ap. mellifera</i>        | XP_003249794. | 202         | Group15.14                 | -1     | 609315   | 608097   | 3       | NCBI-RefSeq model corresponding to GB14757, but without extra 12 aa at 5' end |
| <i>Ca. floridanus</i>       | CFLO15250     | 193         | scaffold309                | -1     | 35342    | 37142    | 3       | OGSv1.0, missing 5' region (EFN64641/GL441542.1)                              |
| <i>T. castaneum</i>         | TC012810      | 279         | ChLG9                      | -1     | 20555016 | 20556390 | 2       | TCOGS2 (XP_996928.2 missing 5' and 3')                                        |
| <i>Ac. pisum</i>            | ACYPI003143   | 316         | GL349857                   | -      | 465923   | 448880   | 5       |                                                                               |
| <i>P. humanus</i>           | PHUM026320    | 346         | DS235004.1                 | -1     | 482961   | 481380   | 3       |                                                                               |

| Osiris 12                   |                |             |                            |        |          |          |         |                                                                                                    |
|-----------------------------|----------------|-------------|----------------------------|--------|----------|----------|---------|----------------------------------------------------------------------------------------------------|
| Genome                      | ID             | Length (AA) | Chromosome (linkage group) | Direct | Start    | End      | # exons | Note                                                                                               |
| <i>D. melanogaster</i>      | CG1154         | 295         | 3R                         | 1      | 2104429  | 2107526  | 2       |                                                                                                    |
| <i>D. pseudoobscura</i>     | GA11059        | 310         | 2                          | 1      | 15724932 | 15722318 | 2       |                                                                                                    |
| <i>D. virilis</i>           | GJ14258        | 296         | scaffold_12822             | 1      | 1759247  | 1755541  | 2       |                                                                                                    |
| <i>D. grimshawi</i>         | GH14027        | 306         | scaffold_14624             | 1      | 2773783  | 2770028  | 2       |                                                                                                    |
| <i>An. gambiae</i>          | AGAP013195     | 245         | 2R                         | 1      | 50611644 | 50612588 | 2       |                                                                                                    |
| <i>Ae. aegypti</i>          | AAEL002957a    | 232         | supercont1.73              | +      | 533897   | 545601   | 2       | based on AAEL002957 ex4-ex5:                                                                       |
| <i>Cu. quinquefasciatus</i> | CPIJ008135     | 342         | supercont3.179             | 1      | 128851   | 120079   | 5       |                                                                                                    |
| <i>B. mori</i>              | BGIBMGA000047  | 234         | nscaf1071                  | 1      | 860527   | 877819   | 3       | BGIBMGA00004 missing 3' end; Augustus model nscaf1071:860527..860929,866403..866530,877646..877819 |
| <i>Ap. mellifera</i>        | XP_001121769.1 | 263         | Group15.14                 | 1      | 614359   | 615150   | 1       | NCBI_RefSeq model corresponding to GB18845, but with extra 41 aa at N-term (LG15:4593479..4594270) |
| <i>Ca. floridanus</i>       | CFLO15245      | 257         | scaffold309                | 1      | 31139    | 30366    | 1       | OGSv1.0 (EFN64640/GL441542.1)                                                                      |
| <i>T. castaneum</i>         | TC011665       | 237         | ChLG9                      | 1      | 20552342 | 20551573 | 2       | TCOGS2, XP_966834.1                                                                                |
| <i>Ac. pisum</i>            | ACYPI000603    | 255         | GL349857                   | +      | 445712   | 449651   | 2       |                                                                                                    |
| <i>P. humanus</i>           | None           |             |                            |        |          |          |         |                                                                                                    |

| Osiris 13                   |              |             |                            |        |          |          |         |                                               |
|-----------------------------|--------------|-------------|----------------------------|--------|----------|----------|---------|-----------------------------------------------|
| Genome                      | ID           | Length (AA) | Chromosome (linkage group) | Direct | Start    | End      | # exons | Note                                          |
| <i>D. melanogaster</i>      | CG15595      | 210         | 3R                         | 1      | 2117624  | 2118491  | 2       |                                               |
| <i>D. pseudoobscura</i>     | GA13837      | 219         | 2                          | 1      | 15713662 | 15712936 | 2       |                                               |
| <i>D. virilis</i>           | GJ14260      | 207         | scaffold_12822             | 1      | 1745092  | 1744398  | 2       |                                               |
| <i>D. grimshawi</i>         | GH14029      | 208         | scaffold_14624             | 1      | 2759717  | 2758601  | 2       |                                               |
| <i>An. gambiae</i>          | None         |             |                            |        |          |          |         |                                               |
| <i>Ae. aegypti</i>          | None         |             |                            |        |          |          |         |                                               |
| <i>Cu. quinquefasciatus</i> | None         |             |                            |        |          |          |         |                                               |
| <i>B. mori</i>              | BGIBMGA00004 | 222         | nscaf1071                  | 1      | 889090   | 891513   | 3       | Weak similarity                               |
| <i>Ap. mellifera</i>        |              |             |                            |        |          |          |         |                                               |
| <i>Ca. floridanus</i>       | CFLO15246    | 225         | scaffold309                | 1      | 23657    | 21613    | 3       | OGSv1.0 (EFN64638/GL441542.1) weak similarity |
| <i>T. castaneum</i>         | None         |             |                            |        |          |          |         |                                               |
| <i>Ac. pisum</i>            | None         |             |                            |        |          |          |         |                                               |
| <i>P. humanus</i>           | None         |             |                            |        |          |          |         |                                               |



| Osiris 14                   |              |             |                            |        |          |          |         |                                                         |
|-----------------------------|--------------|-------------|----------------------------|--------|----------|----------|---------|---------------------------------------------------------|
| Genome                      | ID           | Length (AA) | Chromosome (linkage group) | Direct | Start    | End      | # exons | Note                                                    |
| <i>D. melanogaster</i>      | CG1155       | 268         | 3R                         | 1      | 2124973  | 2126299  | 3       |                                                         |
| <i>D. pseudoobscura</i>     | GA11061      | 269         | 2                          | 1      | 15707310 | 15706315 | 3       |                                                         |
| <i>D. virilis</i>           | GJ14261      | 277         | scaffold_12822             | 1      | 1737239  | 1736231  | 3       |                                                         |
| <i>D. grimshawi</i>         | GH14030      | 270         | scaffold_14624             | 1      | 2750767  | 2749290  | 3       |                                                         |
| <i>An. gambiae</i>          | AGAP003465   | 280         | 2R                         | 1      | 38016606 | 38018316 | 3       |                                                         |
| <i>Ae. aegypti</i>          | AAEL002962   | 290         | supercont1.73              | +      | 921829   | 928099   | 3       |                                                         |
| <i>Cu. quinquefasciatus</i> | CPIJ009837   | 273         | supercont3.253             | -      | 539625   | 536876   | 3       |                                                         |
| <i>B. mori</i>              | BGIBMGA00005 | 189         | nscaf1071                  | 1      | 899025   | 905630   | 4       |                                                         |
| <i>Ap. mellifera</i>        | GB19255      | 267         | Group15.14                 | 1      | 625746   | 627315   | 3       | Amel_2.0_OGSv1_gmap (XP_392084.1 LG15:4604768..4606632) |
| <i>Ca. floridanus</i>       | CFLO15247    | 262         | scaffold309                | 1      | 18470    | 16528    | 3       | OGSv1.0 (EFN64637/GL441542.1)                           |
| <i>T. castaneum</i>         | TC011827     | 245         | ChLG9                      | 1      | 17784120 | 17783271 | 3       | TCOGS2, XP_972144.1                                     |
| <i>Ac. pisum</i>            | ACYPI010031  | 258         | GL349857                   | -      | 367021   | 365776   | 3       |                                                         |
| <i>P. humanus</i>           | PHUM026630   | 271         | DS235004.1                 | 1      | 514933   | 515929   | 3       |                                                         |

| Osiris 15                   |            |             |                            |        |          |          |         |                                                            |
|-----------------------------|------------|-------------|----------------------------|--------|----------|----------|---------|------------------------------------------------------------|
| Genome                      | ID         | Length (AA) | Chromosome (linkage group) | Direct | Start    | End      | # exons | Note                                                       |
| <i>D. melanogaster</i>      | CG1157     | 214         | 3R                         | 1      | 2127635  | 2128897  | 3       |                                                            |
| <i>D. pseudoobscura</i>     | GA11070    | 214         | 2                          | 1      | 15704652 | 15703720 | 3       |                                                            |
| <i>D. virilis</i>           | GJ14262    | 215         | scaffold_12822             | 1      | 1734711  | 1733651  | 3       |                                                            |
| <i>D. grimshawi</i>         | GH14031    | 214         | scaffold_14624             | 1      | 2747671  | 2746647  | 3       |                                                            |
| <i>An. gambiae</i>          | AGAP003466 | 206         | 2R                         | 1      | 38023425 | 38027635 | 3       |                                                            |
| <i>Ae. aegypti</i>          | AAEL002949 | 206         | supercont1.73              | +      | 947347   | 977880   | 3       |                                                            |
| <i>Cu. quinquefasciatus</i> | CPIJ009835 | 208         | supercont3.253             | -      | 520208   | 503607   | 3       |                                                            |
| <i>B. mori</i>              | None       |             |                            |        |          |          |         |                                                            |
| <i>Ap. mellifera</i>        | GB14511    | 233         | Group15.14                 | 1      | 629349   | 631777   | 2       | Amel_2.0_OGSv1_gmap (XP_001121861.1 LG15:4608426..4611097) |
| <i>Ca. floridanus</i>       | CFLO15248  | 234         | scaffold309                | 1      | 14885    | 12348    | 2       | OGSv1.0 (EFN64636/GL441542.1)                              |
| <i>T. castaneum</i>         | TC011828   | 188         | ChLG9                      | 1      | 17771168 | 17770175 | 2       | TCOGS2, XP_971987.1                                        |
| <i>Ac. pisum</i>            | None       |             |                            |        |          |          |         |                                                            |
| <i>P. humanus</i>           | None       |             |                            |        |          |          |         |                                                            |

| Osiris 16                   |                              |             |                            |        |          |          |         |                                                        |
|-----------------------------|------------------------------|-------------|----------------------------|--------|----------|----------|---------|--------------------------------------------------------|
| Genome                      | ID                           | Length (AA) | Chromosome (linkage group) | Direct | Start    | End      | # exons | Note                                                   |
| <i>D. melanogaster</i>      | CG31561                      | 278         | 3R                         | 1      | 2130992  | 2131887  | 2       |                                                        |
| <i>D. pseudoobscura</i>     | GA16326                      | 277         | 2                          | 1      | 15701265 | 15700368 | 2       |                                                        |
| <i>D. virilis</i>           | GJ14264                      | 278         | scaffold_12822             | 1      | 1731967  | 1730888  | 2       |                                                        |
| <i>D. grimshawi</i>         | GH14033                      | 276         | scaffold_14624             | 1      | 2745403  | 2744257  | 2       |                                                        |
| <i>An. gambiae</i>          | AGAP003467                   | 238         | 2R                         | 1      | 38030429 | 38031217 | 2       | 16a                                                    |
|                             | AGAP003472                   | 238         | 2R                         | 1      | 38077169 | 38077957 | 2       | 16b                                                    |
| <i>Ae. aegypti</i>          | AAEL002961                   | 254         | supercont1.73              | +      | 1025518  | 1038012  | 2       |                                                        |
| <i>Cu. quinquefasciatus</i> | CPIJ009834                   | 243         | supercont3.253             | -      | 495771   | 494975   | 2       |                                                        |
| <i>B. mori</i>              | BGIBMGA00005                 | 248         | nscaf1071                  | 1      | 916070   | 920540   | 2       | 16a                                                    |
|                             | BGIBMGA00005                 | 222         | nscaf1071                  | 1      | 924686   | 927766   | 2       | 16b                                                    |
|                             | See Osiris-like located here |             |                            |        |          |          |         |                                                        |
| <i>Ap. mellifera</i>        | GB16524                      | 303         | Group15.14                 | 1      | 636935   | 638007   | 2       | Amel_2.0_OGSv1_gmap (XP_001121887.1 includes extra 3') |
| <i>Ca. floridanus</i>       | CFLO15249                    | 294         | scaffold309                | 1      | 6971     | 5865     | 2       | OGSv1.0 (EFN64635/GL441542.1)                          |
| <i>T. castaneum</i>         | TC012679                     | 257         | ChLG9                      | -1     | 17774547 | 17775320 | 1       | 16b, TCOGS2, XP_972042.1                               |
|                             | TC012680                     | 260         | ChLG9                      | -1     | 17778206 | 17781508 | 2       | 16a, TCOGS2, XP_972093.1                               |
| <i>Ac. pisum</i>            | ACYPI37215                   | 395         | GL349857                   | -      | 264785   | 258197   | 3       | 16c                                                    |
|                             | ACYPI37213                   | 335         | GL349857                   | -      | 335265   | 325498   | 3       | 16b                                                    |
|                             | ACYPI37212                   | 206         | GL349857                   | -      | 347582   | 342664   | 3       | 16a                                                    |
|                             | ACYPI37197                   | 271         | GL349857                   | +      | 386913   | 389207   | 2       | 16f, located before Osi14                              |
|                             | ACYPI37210                   | 284         | GL349857                   | -      | 398236   | 395754   | 2       | 16e, located before Osi14                              |
|                             | ACYPI007501                  | 287         | GL349857                   | -      | 402294   | 399369   | 2       | 16d, located before Osi14                              |
| <i>P. humanus</i>           | None                         |             |                            |        |          |          |         |                                                        |

| Osiris 17                   |                |             |                            |        |          |          |         |                                                                                                                                                                                                             |
|-----------------------------|----------------|-------------|----------------------------|--------|----------|----------|---------|-------------------------------------------------------------------------------------------------------------------------------------------------------------------------------------------------------------|
| Genome                      | ID             | Length (AA) | Chromosome (linkage group) | Direct | Start    | End      | # exons | Note                                                                                                                                                                                                        |
| <i>D. melanogaster</i>      | CG15598        | 648         | 3R                         | 1      | 2141609  | 2152519  | 8       |                                                                                                                                                                                                             |
| <i>D. pseudoobscura</i>     | GA26496-PA     | 740         | 2                          | 1      | 15692057 | 15683149 | 9       | Isoforms                                                                                                                                                                                                    |
|                             | GA26496-PC     | 654         | 2                          | 1      | 15692183 | 15683149 | 9       | Isoforms                                                                                                                                                                                                    |
| <i>D. virilis</i>           | GJ14266        | 705         | scaffold_12822             | 1      | 1717024  | 1703545  | 9       |                                                                                                                                                                                                             |
| <i>D. grimshawi</i>         | GH14034a       | 761         | scaffold_14624             | 1      | 2735733  | 2723660  | 9       | last exon removed. Revised model: (2723660..2723801,2726507..2726685,2726749..2726859,2728780..2728978,2729765..2730073,2730663..2730850,2733027..2733280,2733378..2733611,2735064..2735                    |
| <i>An. gambiae</i>          | AGAP003468     | 661         | 2R                         | 1      | 38042427 | 38056441 | 8       |                                                                                                                                                                                                             |
| <i>Ae. aegypti</i>          | AAEL002966a    | 598         | supercont1.73              | +      | 1118311  | 1246764  | 8       | AAEL002966 + AAEL002952 genewise model: CDS(1118311..1118617,1155934..1156176,1166316..1166569,1182188..1182342,1183777..1184010,1193705..1193876,1215056..1215336,1246614..1246764), start codon not found |
| <i>Cu. quinquefasciatus</i> | CPIJ009830a    | 669         | supercont3.253             | -      | 449432   | 366128   | 8       | CPIJ009830+CPIJ009831+CPIJ009832+CPIJ009833; genewise model: CDS(449432..449153,417630..417388,413069..412816,406802..406639,403596..403396,393345..393201,379175..378895,366278..366128); Need to check    |
| <i>B. mori</i>              | BGIBMGA000054  | 588         | nscaf1071                  | 1      | 968425   | 985551   | 10      |                                                                                                                                                                                                             |
| <i>Ap. mellifera</i>        | XP_001121915.2 | 586         | Group15.14                 | 1      | 655434   | 658194   | 4       | NCBI-RefSeq model corresponding to GB16817, but with extra 91 aa at N-term (LG15:4634123..4638274)                                                                                                          |
| <i>Ca. floridanus</i>       | CFLO14498      | 560         | scaffold767                | -      | 348549   | 345974   | 5       | OGSv1.0 (EFN71496/GL436778.1)                                                                                                                                                                               |
| <i>T. castaneum</i>         | None           |             |                            |        |          |          |         |                                                                                                                                                                                                             |
| <i>Ac. pisum</i>            | ACYPI006202    | 525         | GL349975                   | +      | 190119   | 206662   | 7       |                                                                                                                                                                                                             |
| <i>P. humanus</i>           | PHUM497620a    | 645         | DS235830.1                 | -      | 141828   | 133937   | 8       | PHUM497620+PHUM497610; GeneWise model: 141828..141297, 138866..138492, 135455..135226, 135153..134991, 134907..134726, 134649..134541, 134461..134257, 134078..133937                                       |

| Osiris 18                   |              |             |                            |        |          |          |         |                                                                           |
|-----------------------------|--------------|-------------|----------------------------|--------|----------|----------|---------|---------------------------------------------------------------------------|
| Genome                      | ID           | Length (AA) | Chromosome (linkage group) | Direct | Start    | End      | # exons | Note                                                                      |
| <i>D. melanogaster</i>      | CG1169       | 306         | 3R                         | 1      | 2156073  | 2157285  | 2       |                                                                           |
| <i>D. pseudoobscura</i>     | GA11143      | 313         | 2                          | 1      | 15676247 | 15675240 | 2       |                                                                           |
| <i>D. virilis</i>           | GJ14267      | 309         | scaffold_12822             | 1      | 1700037  | 1699044  | 2       |                                                                           |
| <i>D. grimshawi</i>         | GH14035      | 318         | scaffold_14624             | 1      | 2720195  | 2719171  | 2       |                                                                           |
| <i>An. gambiae</i>          | AGAP003469   | 265         | 2R                         | -1     | 38058328 | 38057430 | 2       |                                                                           |
|                             | AGAP012548   | 106         | UNKN                       | -1     | 14659597 | 14654022 | 2       | Almost identical copy in unknown location; possible assembly mistake; see |
| <i>Ae. aegypti</i>          | AAEL002965   | 266         | supercont1.73              | -      | 1259787  | 1258929  | 2       |                                                                           |
| <i>Cu. quinquefasciatus</i> | CPIJ009829   | 267         | supercont3.253             | +      | 356854   | 357720   | 2       |                                                                           |
| <i>B. mori</i>              | BGIBMGA00000 | 270         | nscaf1071                  | -1     | 993294   | 992334   | 3       |                                                                           |
| <i>Ap. mellifera</i>        | GB16900      | 249         | Group15.14                 | 1      | 659884   | 660816   | 3       | Amel_2.0_OGSv1_gmap (XP_001121942.2 LG15:4638990..4640092)                |
| <i>Ca. floridanus</i>       | CFLO14499    | 246         | scaffold767                | -      | 342467   | 341404   | 3       | OGSv1.0 (EFN71495/GL436778.1)                                             |
| <i>T. castaneum</i>         | TC012820     | 246         | ChLG9                      | -1     | 20684703 | 20685544 | 3       | TCOGS2, XP_968992.1                                                       |
| <i>Ac. pisum</i>            | ACYPI009026  | 242         | GL349975                   | +      | 217232   | 219193   | 4       |                                                                           |
| <i>P. humanus</i>           | PHUM497600   | 285         | DS235830.1                 | +      | 123337   | 124403   | 3       |                                                                           |

| Osiris 19                   |              |             |                            |        |          |          |         |                                                                           |
|-----------------------------|--------------|-------------|----------------------------|--------|----------|----------|---------|---------------------------------------------------------------------------|
| Genome                      | ID           | Length (AA) | Chromosome (linkage group) | Direct | Start    | End      | # exons | Note                                                                      |
| <i>D. melanogaster</i>      | CG15189-PA   | 266         | 3R                         | 1      | 2161165  | 2162662  | 4       | isoform                                                                   |
|                             | CG15189-PB   | 257         | 3R                         | 1      | 2161165  | 2162659  | 4       | isoform                                                                   |
| <i>D. pseudoobscura</i>     | GA13557      | 273         | 2                          | 1      | 15672361 | 15670940 | 4       |                                                                           |
| <i>D. virilis</i>           | GJ14268      | 266         | scaffold_12822             | 1      | 1695141  | 1693812  | 4       |                                                                           |
| <i>D. grimshawi</i>         | GH14036      | 262         | scaffold_14624             | 1      | 2716195  | 2714924  | 4       |                                                                           |
| <i>An. gambiae</i>          | AGAP003470   | 232         | 2R                         | 1      | 38061429 | 38062320 | 3       |                                                                           |
|                             | AGAP012549   | 247         | UNKN                       | +      | 14662691 | 14663580 | 3       | Almost identical copy in unknown location; possible assembly mistake; see |
| <i>Ae. aegypti</i>          | AAEL002960   | 250         | supercont1.73              | +      | 1285435  | 1286307  | 3       |                                                                           |
| <i>Cu. quinquefasciatus</i> | CPIJ009828   | 251         | supercont3.253             | -      | 344600   | 343725   | 3       |                                                                           |
|                             |              |             |                            |        |          |          |         |                                                                           |
| <i>B. mori</i>              | BGIBMGA01071 | 258         | nscaf3003                  | -      | 3992132  | 3991021  | 3       |                                                                           |
| <i>Ap. mellifera</i>        | GB16804      | 247         | Group15.14                 | 1      | 663088   | 663932   | 2       | Amel_2.0_OGSv1_gmap (XP_001121961.1 LG15:4642085..4643841)                |
| <i>Ca. floridanus</i>       | CFLO14500    | 247         | scaffold767                | -      | 339201   | 338256   | 2       | OGSv1.0 (EFN71494/GL436778.1)                                             |
| <i>T. castaneum</i>         | TC012821     | 243         | ChLG9                      | -1     | 20686916 | 20687749 | 3       | 19a, TCOGS2, XP_969068.1                                                  |
|                             | TC012822     | 196         | ChLG9                      | -1     | 20689368 | 20690009 | 2       | 19b, TCOGS2, XP_969215.1                                                  |
| <i>Ac. pisum</i>            | ACYPI000796  | 190         | GL349975                   | +      | 226304   | 227943   | 4       |                                                                           |
| <i>P. humanus</i>           | PHUM497590   | 255         | DS235830.1                 | -      | 122029   | 121084   | 3       |                                                                           |
|                             |              |             |                            |        |          |          |         |                                                                           |

| Genome                      | Osiris 20      |             |                            |        |          |          |         | Note                                                                                                |
|-----------------------------|----------------|-------------|----------------------------|--------|----------|----------|---------|-----------------------------------------------------------------------------------------------------|
|                             | ID             | Length (AA) | Chromosome (linkage group) | Direct | Start    | End      | # exons |                                                                                                     |
| <i>D. melanogaster</i>      | CG15188        | 280         | 3R                         | 1      | 2165910  | 2166818  | 2       |                                                                                                     |
| <i>D. pseudoobscura</i>     | GA13556        | 276         | 2                          | 1      | 15666849 | 15665952 | 2       |                                                                                                     |
| <i>D. virilis</i>           | GJ14269        | 277         | scaffold_12822             | 1      | 1689890  | 1688986  | 2       |                                                                                                     |
| <i>D. grimshawi</i>         | GH14037        | 280         | scaffold_14624             | 1      | 2711690  | 2710778  | 2       |                                                                                                     |
| <i>An. gambiae</i>          | AGAP003471     | 320         | 2R                         | 1      | 38065791 | 38066897 | 2       |                                                                                                     |
| <i>Ae. aegypti</i>          | AAEL002955     | 292         | supercont1.73              | +      | 1305642  | 1313330  | 2       |                                                                                                     |
|                             | AAEL014727     | 292         | supercont1.1240            | -      | 188349   | 182326   | 2       | 20b, Unlinked Osi20 copy; almost identical                                                          |
| <i>Cu. quinquefasciatus</i> | CPIJ009827     | 297         | supercont3.253             | -      | 330657   | 327540   | 2       |                                                                                                     |
| <i>B. mori</i>              | BGIBMGA010717  | 293         | nscaf3003                  | -      | 3982740  | 3981708  | 3       |                                                                                                     |
| <i>Ap. mellifera</i>        | XP_001121985.1 | 270         | Group15.14                 | 1      | 665962   | 666847   | 2       | NCBI_RefSeq model corresponding to GB15865, but with extra 120 aa at 5' end (LG15:4644922..4646726) |
| <i>Ca. floridanus</i>       | CFLO14501      | 267         | scaffold767                | -      | 335705   | 334509   | 2       | OGSv1.0 (EFN71493/GL436778.1)                                                                       |
| <i>T. castaneum</i>         | TC012823       | 248         | ChLG9                      | -1     | 20691474 | 20692314 | 3       | TCOGS2, XP_969284.1                                                                                 |
| <i>Ac. pisum</i>            | ACYPI007146    | 281         | GL349975                   | +      | 238670   | 239799   | 2       |                                                                                                     |
| <i>P. humanus</i>           | PHUM497570     | 290         | DS235830.1                 | -      | 117238   | 116133   | 4       |                                                                                                     |

| Osiris 22                   |               |             |                            |        |          |          |         |                       |
|-----------------------------|---------------|-------------|----------------------------|--------|----------|----------|---------|-----------------------|
| Genome                      | ID            | Length (AA) | Chromosome (linkage group) | Direct | Start    | End      | # exons | Note                  |
| <i>D. melanogaster</i>      | CG8644        | 332         | 3R                         | 1      | 9116438  | 9117497  | 2       |                       |
| <i>D. pseudoobscura</i>     | GA21234       | 342         | 2                          | 1      | 9987757  | 9986666  | 2       |                       |
| <i>D. virilis</i>           | GJ10414       | 363         | scaffold_12855             | -      | 3036310  | 3035156  | 2       |                       |
| <i>D. grimshawi</i>         | GH18427       | 339         | scaffold_14906             | -      | 5747016  | 5745936  | 2       |                       |
| <i>An. gambiae</i>          | AGAP003420    | 366         | 2R                         | 1      | 37510453 | 37511640 | 2       |                       |
| <i>Ae. aegypti</i>          | AAEL007198    | 359         | supercont1.243             | +      | 914044   | 915223   | 2       |                       |
| <i>Cu. quinquefasciatus</i> | CPIJ011100    | 345         | supercont3.316             | +      | 372903   | 374003   | 2       |                       |
| <i>B. mori</i>              | BGIBMGA010678 | 163         | nscaf2998                  | +      | 1317487  | 1322074  | 2       | Middle region missing |
| <i>Ap. mellifera</i>        | None          |             |                            |        |          |          |         |                       |
| <i>Ca. floridanus</i>       | None          |             |                            |        |          |          |         |                       |
| <i>T. castaneum</i>         | TC002385      | 151         | unknown                    | +      | 15336400 | 15336898 | 2       | Middle region missing |
| <i>Ac. pisum</i>            | ACYPI002813   | 196         | GL350227                   | -      | 167081   | 164772   | 3       | Middle region         |
| <i>P. humanus</i>           | None          |             |                            |        |          |          |         |                       |



| Osiris 23                   |                |             |                            |        |          |          |         |                                                                                                                                                                                    |
|-----------------------------|----------------|-------------|----------------------------|--------|----------|----------|---------|------------------------------------------------------------------------------------------------------------------------------------------------------------------------------------|
| Genome                      | ID             | Length (AA) | Chromosome (linkage group) | Direct | Start    | End      | # exons | Note                                                                                                                                                                               |
| <i>D. melanogaster</i>      | CG15538        | 250         | 3R                         | -1     | 26270756 | 26269871 | 3       |                                                                                                                                                                                    |
| <i>D. pseudoobscura</i>     | GA13796        | 270         | 2                          | -1     | 1254748  | 1255676  | 3       |                                                                                                                                                                                    |
| <i>D. virilis</i>           | GJ22762        | 265         | scaffold_13047             | -      | 15824251 | 15823319 | 3       |                                                                                                                                                                                    |
| <i>D. grimshawi</i>         | GH17432        | 264         | scaffold_14830             | +      | 4185984  | 4186905  | 3       |                                                                                                                                                                                    |
| <i>An. gambiae</i>          | AGAP000957     | 293         | X                          | -      | 18368810 | 18367147 | 4       |                                                                                                                                                                                    |
| <i>Ae. aegypti</i>          | None           |             |                            |        |          |          |         | Short similarity against AGAP000957 and CG15538 found in supercont1.202:13944741394301                                                                                             |
| <i>Cu. quinquefasciatus</i> | Cqui_Osi23     | 189         | supercont3.42              | +      | 474599   | 480673   | 3       | GeneWise+Augustus model: 474599..474855,474955..475082,480489..480673; still missing 3'                                                                                            |
| <i>B. mori</i>              | None           |             |                            |        |          |          |         |                                                                                                                                                                                    |
| <i>Ap. mellifera</i>        | XP_001120227.2 | 254         | Group8.6                   | -      | 87657    | 86288    | 3       | NCBI_RefSeq model corresponding to GB14285, but with extra 14 aa at N-term (LG8:2309823..2307814)                                                                                  |
| <i>Ca. floridanus</i>       | CFLO22710      | 249         | scaffold799                |        | 210020   | 211808   | 3       | OGSv1.0 (EFN70025/GL437711.1)                                                                                                                                                      |
| <i>T. castaneum</i>         | TC030703a      | 226         | ChLG2                      | +      | 11496092 | 11497260 | 3       | TC030703:TCOGS2 with extra N/C-term. XP_970499.1 (non-Osi protein) includes this as part of its exons.<br>AUGUSTUS model: 11496092..11496258,11496701..11496798,11496845..11497260 |
| <i>Ac. pisum</i>            | ACYPI50421     | 217         | GL350440                   | -      | 80703    | 67062    | 3       |                                                                                                                                                                                    |
| <i>P. humanus</i>           | None           |             |                            |        |          |          |         |                                                                                                                                                                                    |

| Osiris 21                   |                |             |                            |        |          |          |         |                                                                                                                                     |
|-----------------------------|----------------|-------------|----------------------------|--------|----------|----------|---------|-------------------------------------------------------------------------------------------------------------------------------------|
| Genome                      | ID             | Length (AA) | Chromosome (linkage group) | Strand | Start    | End      | # exons | Note                                                                                                                                |
| <i>D. melanogaster</i>      | CG14925        | 282         | 2L                         | -      | 11285603 | 11284586 | 2       |                                                                                                                                     |
| <i>D. pseudoobscura</i>     | GA13356        | 280         | 4_group3                   | -      | 6710686  | 6709780  | 2       |                                                                                                                                     |
| <i>D. virilis</i>           | GJ14913        | 277         | scaffold_12963             | +      | 2228486  | 2229378  | 2       |                                                                                                                                     |
| <i>D. grimshawi</i>         | GH13529        | 291         | scaffold_15126             | +      | 1313369  | 1314317  | 2       |                                                                                                                                     |
| <i>An. gambiae</i>          | AGAP005899     | 256         | 2L                         | -      | 23383765 | 23382399 | 3       | 21a                                                                                                                                 |
|                             | AGAP010354     | 242         | 3L                         | -      | 2060900  | 2060107  | 2       | 21b                                                                                                                                 |
| <i>Ae. aegypti</i>          | AAEL004788     | 264         | supercont1.130             | +      | 1236881  | 1240903  | 3       | 21a                                                                                                                                 |
|                             | AAEL014873     | 242         | supercont1.1318            | -      | 61163    | 25952    | 2       | 21b                                                                                                                                 |
| <i>Cu. quinquefasciatus</i> | CPIJ006501     | 255         | supercont3.125             | -      | 457478   | 456268   | 2       | 21c                                                                                                                                 |
|                             | CPIJ016349     | 255         | supercont3.798             | +      | 131376   | 132525   | 2       | 21b                                                                                                                                 |
|                             | CPIJ004911     | 270         | supercont3.80              | +      | 580797   | 581778   | 3       | 21a                                                                                                                                 |
| <i>B. mori</i>              | BGIBMGA013568a | 216         | nscaf3078                  | +      | 404693   | 405837   | 4       | BGIBMGA013568+BGIBMGA013569<br>GeneWise model:<br>404693..404875,404959..405151,<br>405257..405437,405754..405837;<br>need to check |
| <i>Ap. mellifera</i>        | None           |             |                            |        |          |          |         |                                                                                                                                     |
| <i>Ca. floridanus</i>       | None           |             |                            |        |          |          |         |                                                                                                                                     |
| <i>T. castaneum</i>         | TC013496       | 250         | ChLG5                      | -      | 10767500 | 10766748 | 1       | TCOGS2, XP_976416.1                                                                                                                 |
| <i>Ac. pisum</i>            | ACYPI008994    | 252         | GL350028                   | -      | 167549   | 164571   | 2       | 21c                                                                                                                                 |
|                             | ACYPI43145     | 245         | GL350028                   | -      | 154956   | 151423   | 2       | 21b                                                                                                                                 |
|                             | ACYPI005783    | 258         | GL350028                   | -      | 135395   | 126447   | 2       | 21a                                                                                                                                 |
|                             | ACYPI064603    | 141         | GL356106                   | +      | 0        | 3876     | 2       | 21a2, missing 5' and 3'-ends                                                                                                        |
| <i>P. humanus</i>           | None           |             |                            |        |          |          |         |                                                                                                                                     |

| Osiris like                 |               |             |                            |        |        |        |         |                           |
|-----------------------------|---------------|-------------|----------------------------|--------|--------|--------|---------|---------------------------|
| Genome                      | ID            | Length (AA) | Chromosome (linkage group) | Direct | Start  | End    | # exons | Note                      |
| <i>D. melanogaster</i>      |               |             |                            |        |        |        |         |                           |
| <i>D. pseudoobscura</i>     |               |             |                            |        |        |        |         |                           |
| <i>D. virilis</i>           |               |             |                            |        |        |        |         |                           |
| <i>D. grimshawi</i>         |               |             |                            |        |        |        |         |                           |
| <i>An. gambiae</i>          |               |             |                            |        |        |        |         |                           |
| <i>Ae. aegypti</i>          |               |             |                            |        |        |        |         |                           |
| <i>Cu. quinquefasciatus</i> |               |             |                            |        |        |        |         |                           |
| <i>B. mori</i>              | BGIBMGA000053 | 493         | nscaf1071                  | 1      | 931016 | 939783 | 7       | located after Osi16b      |
| <i>Ap. mellifera</i>        |               |             |                            |        |        |        |         |                           |
| <i>Ca. floridanus</i>       |               |             |                            |        |        |        |         |                           |
| <i>T. castaneum</i>         |               |             |                            |        |        |        |         |                           |
| <i>Ac. pisum</i>            | ACYPI000560   | 419         | GL349857                   | +      | 296605 | 308820 | 5       | Located between 16b and c |
|                             | ACYPI37193    | 286         | GL349857                   | +      | 266124 | 275397 | 3       | Located between 16b and c |
|                             | ACYPI33621    | 262         | GL350199                   | +      | 284013 | 299232 | 2       |                           |
| <i>P. humanus</i>           | PHUM025350    | 285         | DS235004.1                 | -1     | 94973  | 93537  | 3       |                           |
|                             | PHUM025360    | 360         | DS235004.1                 | -1     | 110230 | 108271 | 4       |                           |
|                             | PHUM465410    | 327         | DS235812.1                 | -1     | 294251 | 290973 | 3       |                           |

| CG15594 like                |                  |             |                            |        |        |        |         |                      |
|-----------------------------|------------------|-------------|----------------------------|--------|--------|--------|---------|----------------------|
| Genome                      | ID               | Length (AA) | Chromosome (linkage group) | Direct | Start  | End    | # exons | Note                 |
| <i>D. melanogaster</i>      |                  |             |                            |        |        |        |         |                      |
| <i>D. pseudoobscura</i>     |                  |             |                            |        |        |        |         |                      |
| <i>D. virilis</i>           |                  |             |                            |        |        |        |         |                      |
| <i>D. grimshawi</i>         |                  |             |                            |        |        |        |         |                      |
| <i>An. gambiae</i>          |                  |             |                            |        |        |        |         |                      |
| <i>Ae. aegypti</i>          |                  |             |                            |        |        |        |         |                      |
| <i>Cu. quinquefasciatus</i> |                  |             |                            |        |        |        |         |                      |
| <i>B. mori</i>              | BGIBMGA000048272 |             | nscaf1071                  | 1      | 883002 | 886205 | 2       |                      |
| <i>Ap. mellifera</i>        | XP_003249795.1   | 169         | Group15.14                 | -1     | 617796 | 616879 | 2       | LG15:4597217..459575 |
| <i>Ca. floridanus</i>       | CFLO10930        | 225         | scaffold309                | -1     | 27850  | 28890  | 2       | EFN64639/GL441542    |
| <i>T. castaneum</i>         |                  |             |                            |        |        |        |         |                      |
| <i>Ac. pisum</i>            | ACYPI007103      | 364         | GL349679                   | -1     | 542850 | 539522 | 6       |                      |
| <i>P. humanus</i>           |                  |             |                            |        |        |        |         |                      |
