# Supplementary material for: Evolution of a Large, Conserved, and Syntenic Gene Family in Insects
Source: PubMed Central journal article supplement (PMC3284338; doi:10.1534/g3.111.001412), 2012-02-01
Supplement: supp_2.2.313_TableS3.pdf [file supp_2.2.313_TableS3.pdf]

**Table S3** The list of 24 *Osiris* genes in the *D. melanogaster* genome and those identified from the 11 other *Drosophila* genomes.

|              | <i>D. melanogaster</i> | <i>D. simulans</i>  | <i>D. sechellia</i> | <i>D. yakuba</i> | <i>D. erecta</i> | <i>D. ananassae</i> |
|--------------|------------------------|---------------------|---------------------|------------------|------------------|---------------------|
| <i>Osi1</i>  | CG15585                | GD19841             | GM10858             | GE10183          | GG13122          | GF16371             |
| <i>Osi2</i>  | CG1148                 | GD19845             | GM10863             | GE10186          | GG13136          | GF16375             |
| <i>Osi3</i>  | CG1150                 | GD19846             | GM10864             | GE10187          | GG13139          | GF16376             |
| <i>Osi4</i>  | CG10303                | GD19554             | GM10564             | GE24111          | GG10555          | GF18625             |
| <i>Osi5</i>  | CG15590                | GD19847             | GM10866             | GE10188          | GG13143          | GF16377             |
| <i>Osi6</i>  | CG1151                 | GD19848             | GM10867             | GE10189          | GG13147          | GF16378             |
| <i>Osi7</i>  | CG1153                 | Dsim 7 <sup>‡</sup> | GM10868             | GE10190          | GG13151          | GF16379             |
| <i>Osi8</i>  | CG15591                | GD19849             | GM10869             | GE10191          | GG13155          | GF16380             |
| <i>Osi9</i>  | CG15592                | GD19850             | GM10870             | GE10192          | GG13161          | GF16381             |
| <i>Osi10</i> | CG15593*               | GD19851             | GM10871             | GE10194          | GG13170          | GF16382             |
| <i>Osi11</i> | CG15596                | GD19553             | GM10562             | GE24110          | GG10544          | GF18624             |
| <i>Osi12</i> | CG1154                 | GD19852             | GM10872             | GE10195          | GG13181          | GF16383             |
| <i>Osi13</i> | CG15595                | GD19856             | GM10874             | GE10197          | GG13203          | GF16385             |
| <i>Osi14</i> | CG1155                 | GD19857             | GM10875             | GE10198          | GG13215          | GF16386             |
| <i>Osi15</i> | CG1157                 | GD19858             | GM10877             | GE10199          | GG13226          | GF16387             |
| <i>Osi16</i> | CG31561                | GD19859             | GM10879             | GE10201          | GG13248          | GF16388             |
| <i>Osi17</i> | CG15598                | GD19854             | GM10881             | GE10205          | GG13280          | GF16390             |
| <i>Osi18</i> | CG1169                 | GD19861             | GM10882             | GE10206          | GG13291          | GF16391             |
| <i>Osi19</i> | CG15189                | GD19862             | GM10883             | GE10207          | GG13302          | GF16392             |
| <i>Osi20</i> | CG15188                | GD19863             | GM10884             | GE10208          | GG13313          | GF16393             |
| <i>Osi21</i> | CG14925                | GD22180             | GM11091             | GE12926          | GG10314          | GF15124             |
| <i>Osi22</i> | CG8644                 | GD18894             | GM24095             | GE26258          | GG19544          | GF17589             |
| <i>Osi23</i> | CG15538                | GD17079             | GM12155             | GE23387          | GG11936          | GF23337             |
| <i>Osi24</i> | CG15589                | GD19844             | GM10862             | GE10185          | GG13130          | GF16374             |

|              | <i>D. persimilis</i> | <i>D. pseudoobscura</i> | <i>D. willistoni</i>           | <i>D. virilis</i> | <i>D. mojavensis</i> | <i>D. grimshawi</i>    |
|--------------|----------------------|-------------------------|--------------------------------|-------------------|----------------------|------------------------|
| <i>Osi1</i>  | GL24048              | GA13829                 | GK13029                        | GJ14243           | GI24386              | GH14014** <sup>†</sup> |
| <i>Osi2</i>  | GL24055              | GA11025                 | GK13033                        | GJ14247           | GI24391              | GH14018                |
| <i>Osi3</i>  | GL24056              | GA11035                 | GK13034                        | GJ14248           | GI24392              | GH14019                |
| <i>Osi4</i>  | GL23480              | GA10232                 | GK14207                        | GJ14490           | GI23175              | GH14283                |
| <i>Osi5</i>  | GL24057              | GA13832                 | GK13035                        | GJ14249           | GI24393              | GH14020                |
| <i>Osi6</i>  | GL24058              | GA26494                 | GK13036                        | GJ14250           | GI24394              | GH14022                |
| <i>Osi7</i>  | GL24059              | GA11054                 | GK13037                        | GJ14251           | GI24395              | GH14023                |
| <i>Osi8</i>  | GL24060              | GA13833                 | GK13038                        | GJ14253**         | GI24396              | GH14024                |
| <i>Osi9</i>  | GL24061              | GA13834                 | Dwil <sub>9</sub> <sup>#</sup> | GJ14255           | GI24397              | GH14025                |
| <i>Osi10</i> | GL24062              | GA13835                 | GK13040                        | GJ14257           | GI24398              | GH14026                |
| <i>Osi11</i> | GL23479              | GA13838                 | GK14206                        | GJ14489           | GI23173              | GH14282                |
| <i>Osi12</i> | GL24063              | GA11059                 | GK13041                        | GJ14258           | GI24400              | GH14027                |
| <i>Osi13</i> | GL24066              | GA13837                 | GK13043                        | GJ14260           | GI24402              | GH14029                |
| <i>Osi14</i> | GL24067              | GA11061                 | GK13044                        | GJ14261           | GI24403              | GH14030                |
| <i>Osi15</i> | GL24068              | GA11070                 | GK13045                        | GJ14262           | GI24404              | GH14031                |
| <i>Osi16</i> | GL24070              | GA16326                 | GK13048                        | GJ14264           | GI24405              | GH14033                |
| <i>Osi17</i> | GL24071              | GA26496                 | GK13049                        | GJ14266           | GI24407              | GH14034**              |
| <i>Osi18</i> | GL24072              | GA11143                 | GK13051                        | GJ14267           | GI24408              | GH14035                |
| <i>Osi19</i> | GL24073              | GA13557                 | GK13052                        | GJ14268           | GI24409              | GH14036                |
| <i>Osi20</i> | GL24074              | GA13556                 | GK13053                        | GJ14269           | GI24411              | GH14037                |
| <i>Osi21</i> | GL18575              | GA13356                 | GK21104                        | GJ14913           | GI18143              | GH13529                |
| <i>Osi22</i> | GL24463              | GA21234                 | GK13933                        | GJ10414           | GI24328              | GH18427                |
| <i>Osi23</i> | GL14048              | GA13796                 | GK13129                        | GJ22762           | GI22761              | GH17432                |
| <i>Osi24</i> | GL24053              | GA13830                 | GK13032                        | GJ14246           | GI24390              | GH14017                |

\**Osi10* has two alternative transcripts. For our alignment and phylogenetic analysis, *Osi10*-PA (CG15593-PA) protein sequence was used.

\*\*The annotations for these genes are corrected in this study. See Supplementary Table S2 for details.

<sup>†</sup> These genes are not annotated as *Osiris* orthologs in Flybase.

<sup>‡</sup> *D. simulans Osi7* is not annotated in FlyBase, but the gene is identified in the genome (3R:2090001..2094500).

<sup>#</sup> *D. willistoni Osi9* is not annotated in FlyBase, but the gene is identified in the initial region of GK13040.
