# Supplementary material for: Evolution of a Large, Conserved, and Syntenic Gene Family in Insects
Source: PubMed Central journal article supplement (PMC3284338; doi:10.1534/g3.111.001412), 2012-02-01
Supplement: supp_2.2.313_TableS4.pdf [file supp_2.2.313_TableS4.pdf]

**Table S4 The list of data sources for the arthropod genomes used in this study.**

| Species                         | Source                                                                                                        | Release  |
|---------------------------------|---------------------------------------------------------------------------------------------------------------|----------|
| <i>Drosophila melanogaster</i>  | FlyBase ( <a href="http://flybase.org/">http://flybase.org/</a> )                                             | R5.40    |
| <i>Drosophila simulans</i>      | FlyBase ( <a href="http://flybase.org/">http://flybase.org/</a> )                                             | R1.3     |
| <i>Drosophila sechellia</i>     | FlyBase ( <a href="http://flybase.org/">http://flybase.org/</a> )                                             | R1.3     |
| <i>Drosophila yakuba</i>        | FlyBase ( <a href="http://flybase.org/">http://flybase.org/</a> )                                             | R1.3     |
| <i>Drosophila erecta</i>        | FlyBase ( <a href="http://flybase.org/">http://flybase.org/</a> )                                             | R1.3     |
| <i>Drosophila ananassae</i>     | FlyBase ( <a href="http://flybase.org/">http://flybase.org/</a> )                                             | R1.3     |
| <i>Drosophila pseudoobscura</i> | FlyBase ( <a href="http://flybase.org/">http://flybase.org/</a> )                                             | R2.23    |
| <i>Drosophila persimilis</i>    | FlyBase ( <a href="http://flybase.org/">http://flybase.org/</a> )                                             | R1.3     |
| <i>Drosophila willistoni</i>    | FlyBase ( <a href="http://flybase.org/">http://flybase.org/</a> )                                             | R1.3     |
| <i>Drosophila mojavensis</i>    | FlyBase ( <a href="http://flybase.org/">http://flybase.org/</a> )                                             | R1.3     |
| <i>Drosophila virilis</i>       | FlyBase ( <a href="http://flybase.org/">http://flybase.org/</a> )                                             | R1.3     |
| <i>Drosophila grimshawi</i>     | FlyBase ( <a href="http://flybase.org/">http://flybase.org/</a> )                                             | R1.3     |
| <i>Anopheles gambiae</i>        | VectorBase ( <a href="http://www.vectorbase.org/SequenceData/">http://www.vectorbase.org/SequenceData/</a> )  | AgamP3.6 |
| <i>Aedes aegypti</i>            | VectorBase ( <a href="http://www.vectorbase.org/SequenceData/">http://www.vectorbase.org/SequenceData/</a> )  | AaegL1.2 |
| <i>Culex quinquefasciatus</i>   | VectorBase ( <a href="http://www.vectorbase.org/SequenceData/">http://www.vectorbase.org/SequenceData/</a> )  | CpipJ1.2 |
| <i>Bombyx mori</i>              | Silkworm Genome Database<br>( <a href="http://silkworm.genomics.org.cn">http://silkworm.genomics.org.cn</a> ) |          |

|                                 |                                                                                                                             |                 |
|---------------------------------|-----------------------------------------------------------------------------------------------------------------------------|-----------------|
|                                 |                                                                                                                             | v2.0            |
| <i>Apis mellifera</i>           | BeeBase ( <a href="http://hymenopteragenome.org/beebase/">http://hymenopteragenome.org/beebase/</a> )                       | Amel_4.5        |
| <i>Camponotus floridanus</i>    | Ant Genomes Portal<br>( <a href="http://hymenopteragenome.org/ant_genomes/">http://hymenopteragenome.org/ant_genomes/</a> ) | V3.3            |
| <i>Tribolium castaneum</i>      | BeetleBase ( <a href="http://beetlebase.org/">http://beetlebase.org/</a> )                                                  | Tcas_3.0        |
| <i>Acyrtosiphon pisum</i>       | AphidBase ( <a href="http://www.aphidbase.com/aphidbase">http://www.aphidbase.com/aphidbase</a> )                           | Acyr_2.0        |
| <i>Pediculus humanus</i>        | VectorBase ( <a href="http://www.vectorbase.org/SequenceData/">http://www.vectorbase.org/SequenceData/</a> )                | PhumU1.2        |
| <i>Daphnia pulex</i>            | Joint Genome Institute ( <a href="http://www.jgi.doe.gov">http://www.jgi.doe.gov</a> )                                      | v1.0            |
| <u><i>Ixodes scapularis</i></u> | <u>VectorBase (<a href="http://www.vectorbase.org/SequenceData/">http://www.vectorbase.org/SequenceData/</a>)</u>           | <u>IscaW1.1</u> |
